# Supplementary material for: Unraveling the Mechanism of Xiaochaihu Granules in Alleviating Yeast-Induced Fever Based on Network Analysis and Experimental Validation
Source: MDPI journal article supplement (doi:10.3390/ph17040475), 2024-04-08
Supplement: s1 [file s1]

## Supplementary Material

# Unraveling the Mechanism of Xiaochaihu Granules in Alleviating Yeast-Induced Fever Based on Network Analysis and Experimental Validation

Xiuli Chen, Hao Wu, Peibo Li, Wei Peng, Yonggang Wang, Xiaoli Zhang, Ao Zhang, Jinliang Li, Fenzhao Meng, Weiyue Wang and Weiwei Su\*

Guangdong Engineering & Technology Research Center for Quality and Efficacy Reevaluation of Post-Market Traditional Chinese Medicine, Guangdong Provincial Key Laboratory of Plant Resources, State Key Laboratory of Biocontrol, School of Life Sciences, Sun Yat-sen University, Guangzhou 510275, China

\* Correspondence: lsssw@126.com

**Table S1** The general information of reference standards

| No. | Compounds                           | Batch number  | Source |
|-----|-------------------------------------|---------------|--------|
| 1   | Baicalin                            | 715-200010    | a      |
| 2   | Citric acid                         | 100396-201302 | a      |
| 3   | Baicalarin                          | 111595-201808 | a      |
| 4   | Wogonoside                          | DST190709-026 | b      |
| 5   | Wogonin                             | 111514-201706 | a      |
| 6   | Scutellarin                         | 110842-200403 | a      |
| 7   | Succinic acid                       | 110896-200001 | a      |
| 8   | Calycosin-7-O- $\beta$ -D-glucoside | 111920-201606 | a      |
| 9   | Formononetin                        | C-018-181216  | b      |
| 10  | Chlorogenic acid                    | 110753-201415 | a      |
| 11  | Neochlorogenic acid                 | P20A11L121936 | c      |
| 12  | Chrysin                             | 111701-200501 | a      |
| 13  | Rutin                               | 110080-9705   | a      |
| 14  | Liquiritigenin                      | F1912131      | f      |
| 15  | Isoliquiritigenin                   | F2001050      | f      |
| 16  | Isoliquiritin                       | Y15A10H95344  | c      |
| 17  | Schaftoside                         | Z25O10B101118 | c      |
| 18  | Isoschaftoside                      | P13D11S134210 | c      |
| 19  | Liquiritin apioside                 | 5569          | i      |
| 20  | Saikosaponin c                      | M12O11S126866 | c      |
| 21  | Caffeic acid                        | 110885-200102 | a      |

| No. | Compounds           | Batch number  | Source |
|-----|---------------------|---------------|--------|
| 22  | Saikosaponin A      | 150102        | e      |
| 23  | Saikosaponin B1     | P09M10F82675  | c      |
| 24  | Saikosaponin B2     | Z04S9L69482   | c      |
| 25  | L-Malic acid        | 191123-038    | b      |
| 26  | Phenprobamate       | B21910        | h      |
| 27  | Proline             | BCBZ5040      | g      |
| 28  | Glutamic acid       | 111576-200201 | a      |
| 29  | Aspartic acid       | 140691-201602 | a      |
| 30  | Arginine            | 140685-201305 | a      |
| 31  | Liquiritin          | 111610-201106 | a      |
| 32  | Glycyrrhizic Acid   | P24J10F91300  | c      |
| 33  | Glycyrrhetinic Acid | 471-53-4      | d      |
| 34  | Lobetyolin          | 220321        | e      |

a: National Institutes for Food and Drug Control. b: Zhongshan CN-Biotechnology Co., Ltd. c: Shanghai yuanye Bio-Technology Co., Ltd. d: Beijing Qisong Biotechnology Co., Ltd. e: Zhongshan UNO Biotechnology Development Co., Ltd. f: Shanghai Aladdin Biochemical Technology Co., Ltd. g: Sigma-Aldrich. h: Guangzhou Meilun Biotechnology Co., Ltd. I: Nature standard

Table S2 Identification of chemical components in XCHG by UFLC-Triple TOF-MSMS

| No. | formula                                                      | tr, min | [M+H] <sup>+</sup><br>(error, ppm) | [M-H] <sup>-</sup><br>(error, ppm) | Major fragment ions in<br>positive mode (m, z) <sup>b</sup>                                                                                                                                                                                                                                                            | Major fragment ions in<br>negative mode (m, z) <sup>b</sup>                                                                                                                                                                                                                                            | identification                     | Structure<br>type | Source                     | Reference |
|-----|--------------------------------------------------------------|---------|------------------------------------|------------------------------------|------------------------------------------------------------------------------------------------------------------------------------------------------------------------------------------------------------------------------------------------------------------------------------------------------------------------|--------------------------------------------------------------------------------------------------------------------------------------------------------------------------------------------------------------------------------------------------------------------------------------------------------|------------------------------------|-------------------|----------------------------|-----------|
| 1   | C <sub>6</sub> H <sub>14</sub> N <sub>4</sub> O <sub>2</sub> | 2.15    | 175.1188<br>(-0.6)                 | 173.1038<br>(-3.4)                 | 175.1183[M+H] <sup>+</sup> ,<br>158.0917[M+H-NH <sub>3</sub> ] <sup>+</sup> ,<br>130.0962[M+H-CH <sub>3</sub> N <sub>2</sub> ] <sup>+</sup> ,<br>116.0699[M+H-CH <sub>3</sub> N <sub>2</sub> -NH <sub>3</sub> ] <sup>+</sup> ,<br>70.0645[M+H-CH <sub>3</sub> N <sub>2</sub> -NH <sub>3</sub> -<br>HCOOH] <sup>+</sup> | 173.1030[M-H] <sup>-</sup> ,<br>131.0819[M-H-CH <sub>3</sub> N <sub>2</sub> ] <sup>-</sup> ,                                                                                                                                                                                                           | L(+)-Arginine <sup>a, c</sup>      | Organic acid      | CH, HQ, JBX,<br>DS, DZ, GC |           |
| 2   | C <sub>24</sub> H <sub>42</sub> O <sub>21</sub>              | 2.3     | ND                                 | 665.2107<br>(-5.8)                 | ND                                                                                                                                                                                                                                                                                                                     | 665.2090[M-H] <sup>-</sup> ,<br>485.1492[M-H-Glc-H <sub>2</sub> O] <sup>-</sup> ,<br>443.1412[M-H-Glc-C <sub>2</sub> H <sub>4</sub> O <sub>2</sub> ] <sup>-</sup> ,<br>383.1145[M-H-Glc-C <sub>4</sub> H <sub>8</sub> O <sub>4</sub> ] <sup>-</sup> ,<br>341.1058[M-H-2Glc] <sup>-</sup> ,<br>179.0542 | Stachyose <sup>c</sup>             | Saccharides       | HQ, DZ                     |           |
| 3   | C <sub>4</sub> H <sub>7</sub> NO <sub>4</sub>                | 2.3     | 134.0443<br>(-3.5)                 | 132.0299<br>(-2.7)                 | ND                                                                                                                                                                                                                                                                                                                     | ND                                                                                                                                                                                                                                                                                                     | Aspartic acid <sup>a</sup>         | Organic acid      | CH, JBX, DZ,<br>GC         |           |
| 4   | C <sub>5</sub> H <sub>9</sub> NO <sub>4</sub>                | 2.33    | 148.0599<br>(-2.5)                 | 146.0456<br>(-1.8)                 | ND                                                                                                                                                                                                                                                                                                                     | ND                                                                                                                                                                                                                                                                                                     | Glutamic acid <sup>a</sup>         | Organic acid      | CH, SJ, DZ,<br>GC          |           |
| 5   | C <sub>5</sub> H <sub>12</sub> O <sub>5</sub>                | 2.33    | 153.0755<br>(-1.5)                 | 151.0607<br>(-3.3)                 | 99.0434[M+H-3H <sub>2</sub> O] <sup>+</sup> ,<br>69.0331[M+H-3H <sub>2</sub> O-CH <sub>2</sub> O] <sup>+</sup> ,<br>57.0329                                                                                                                                                                                            | 151.0592[M-H] <sup>-</sup> ,<br>101.0237[M-H-H <sub>2</sub> O-CH <sub>4</sub> O] <sup>-</sup> ,<br>89.0227[M-H-H <sub>2</sub> O-CH <sub>2</sub> O <sub>2</sub> ] <sup>-</sup> ,<br>71.0128[M-H-2H <sub>2</sub> O-CH <sub>2</sub> O <sub>2</sub> ] <sup>-</sup> ,<br>59.0130                            | D-Arabitol or Ribitol <sup>c</sup> | Saccharides       | CH                         |           |
| 6   | C <sub>6</sub> H <sub>12</sub> O <sub>6</sub>                | 2.34    | ND                                 | 179.0556<br>(-2.4)                 | ND                                                                                                                                                                                                                                                                                                                     | 179.0531[M-H] <sup>-</sup> ,<br>89.0226[M-H-C <sub>3</sub> H <sub>7</sub> O <sub>3</sub> ] <sup>-</sup> ,<br>71.0127[M-H-C <sub>3</sub> H <sub>7</sub> O <sub>3</sub> -H <sub>2</sub> O] <sup>-</sup> ,<br>59.0129[M-H-C <sub>4</sub> H <sub>9</sub> O <sub>4</sub> ] <sup>-</sup> ,                   | D-Tagatose or D-<br>Glucose        | Saccharides       | CH, HQ, DS,<br>SJ, DZ, GC  | [1]       |
| 7   | C <sub>6</sub> H <sub>12</sub> O <sub>7</sub>                | 2.34    | ND                                 | 195.0505<br>(-2.6)                 | ND                                                                                                                                                                                                                                                                                                                     | 195.0499[M-H] <sup>-</sup> ,<br>129.0191[M-H-HCOOH-<br>CH <sub>2</sub> O] <sup>-</sup> ,                                                                                                                                                                                                               | Galactonic acid <sup>c</sup>       | Glycosides        | CH, HQ, DS,<br>DZ, GC      |           |

| No. | formula                                         | tr, min | [M+H] <sup>+</sup><br>(error, ppm) | [M-H] <sup>-</sup><br>(error, ppm) | Major fragment ions in<br>positive mode (m, z) <sup>b</sup>                                                                                                                                                                                                                                                                   | Major fragment ions in<br>negative mode (m, z) <sup>b</sup>                                                                                                                                                                                                                              | identification                               | Structure<br>type | Source                     | Reference |
|-----|-------------------------------------------------|---------|------------------------------------|------------------------------------|-------------------------------------------------------------------------------------------------------------------------------------------------------------------------------------------------------------------------------------------------------------------------------------------------------------------------------|------------------------------------------------------------------------------------------------------------------------------------------------------------------------------------------------------------------------------------------------------------------------------------------|----------------------------------------------|-------------------|----------------------------|-----------|
|     |                                                 |         |                                    |                                    |                                                                                                                                                                                                                                                                                                                               | 75.0086[M-H-HCOOH-CH <sub>2</sub> O-3H <sub>2</sub> O] <sup>-</sup> ,                                                                                                                                                                                                                    |                                              |                   |                            |           |
| 8   | C <sub>5</sub> H <sub>11</sub> NO <sub>2</sub>  | 2.36    | 118.0857<br>(-4.7)                 | ND                                 | ND                                                                                                                                                                                                                                                                                                                            | ND                                                                                                                                                                                                                                                                                       | Valine                                       | Organic acid      | CH, HQ, DS,<br>DZ, GC      | [2]       |
| 9   | C <sub>6</sub> H <sub>13</sub> NO <sub>5</sub>  | 2.36    | 180.8650<br>(-1.0)                 | ND                                 | 180.0872[M+H] <sup>+</sup> ,<br>162.0747[M+H-H <sub>2</sub> O] <sup>+</sup> ,<br>144.0642[M+H-2H <sub>2</sub> O] <sup>+</sup> ,<br>84.0434[M+H-2H <sub>2</sub> O-C <sub>2</sub> H <sub>4</sub> O <sub>2</sub> ] <sup>+</sup> ,<br>72.0436[M+H-2H <sub>2</sub> O-C <sub>3</sub> H <sub>5</sub> O <sub>2</sub> ] <sup>+</sup> , | ND                                                                                                                                                                                                                                                                                       | Glucosamine<br>Hydrochloride <sup>c</sup>    | Saccharides       | HQ, DS, DZ,<br>GC          |           |
| 10  | C <sub>5</sub> H <sub>9</sub> NO <sub>2</sub>   | 2.40    | 116.0700<br>(-4.9)                 | ND                                 | 116.0700[M+H] <sup>+</sup> ,<br>70.0646[M+H-HCOOH] <sup>+</sup> ,                                                                                                                                                                                                                                                             | ND                                                                                                                                                                                                                                                                                       | Proline <sup>a, c</sup>                      | Organic acid      | HQ, JBX, DS,<br>SJ, DZ, GC |           |
| 11  | C <sub>12</sub> H <sub>22</sub> O <sub>11</sub> | 2.40    | 343.1234<br>(-0.2)                 | 341.1071<br>(-5.3)                 | ND                                                                                                                                                                                                                                                                                                                            | 341.1058[M-H] <sup>-</sup> ,<br>179.0555[M-H-C <sub>6</sub> H <sub>11</sub> O <sub>5</sub> ] <sup>-</sup> ,<br>161.0462[M-H-C <sub>6</sub> H <sub>11</sub> O <sub>5</sub> -H <sub>2</sub> O] <sup>-</sup> ,<br>89.0243[M-H-C <sub>2</sub> H <sub>6</sub> O <sub>2</sub> ] <sup>-</sup> , | Sucrose <sup>c</sup>                         | Saccharides       | HQ, DS, SJ,<br>DZ, GC      |           |
| 12  | C <sub>6</sub> H <sub>6</sub> O <sub>3</sub>    | 2.40    | 127.0382<br>(-2.9)                 | ND                                 | 127.0388[M+H] <sup>+</sup> ,<br>109.0282[M+H-H <sub>2</sub> O] <sup>+</sup> ,<br>81.0329[M+H-H <sub>2</sub> O-CO] <sup>+</sup> ,<br>69.0331[M+H-C <sub>2</sub> HO <sub>2</sub> ] <sup>+</sup> ,                                                                                                                               | ND                                                                                                                                                                                                                                                                                       | 5-<br>Hydroxymethylfurfur<br>al <sup>c</sup> | Others            | CH, JBX, DS,<br>SJ, DZ, GC |           |
| 13  | C <sub>7</sub> H <sub>12</sub> O <sub>6</sub>   | 2.44    | ND                                 | 191.0194<br>(-3.5)                 | ND                                                                                                                                                                                                                                                                                                                            | 191.0546[M-H] <sup>-</sup> ,<br>127.0383[M-H-H <sub>2</sub> O-HCOOH] <sup>-</sup> ,<br>85.0285                                                                                                                                                                                           | Quinic acid <sup>c</sup>                     | Phenolic<br>acids | CH, DS                     |           |
| 14  | C <sub>5</sub> H <sub>5</sub> N <sub>5</sub>    | 2.47    | 136.0612<br>(-3.9)                 | ND                                 | 136.0613[M+H] <sup>+</sup> ,<br>119.0349[M+H-NH <sub>3</sub> ] <sup>+</sup> ,                                                                                                                                                                                                                                                 | ND                                                                                                                                                                                                                                                                                       | Adenine <sup>c</sup>                         | Others            | CH, HQ, JBX,<br>GC         |           |
| 15  | C <sub>4</sub> H <sub>6</sub> O <sub>5</sub>    | 2.59    | ND                                 | 133.0141<br>(-1.4)                 | ND                                                                                                                                                                                                                                                                                                                            | 133.0136[M-H] <sup>-</sup> ,<br>115.0030[M-H-H <sub>2</sub> O] <sup>-</sup> ,<br>71.0132[M-H-H <sub>2</sub> O-CO <sub>2</sub> ] <sup>-</sup> ,                                                                                                                                           | Malic acid <sup>a, c</sup>                   | Organic acid      | CH, HQ, JBX,<br>DS, SJ, DZ |           |
| 16  | C <sub>4</sub> H <sub>4</sub> O <sub>4</sub>    | 2.6     | ND                                 | 115.0032<br>(-4)                   | ND                                                                                                                                                                                                                                                                                                                            | 114.9981[M-H] <sup>-</sup> ,<br>71.0136[M-H-CO <sub>2</sub> ] <sup>-</sup> ,                                                                                                                                                                                                             | Fumaric acid <sup>c</sup>                    | Organic acid      | HQ, DS, DZ                 |           |

| No. | formula                                                       | tr, min | [M+H] <sup>+</sup><br>(error, ppm) | [M-H] <sup>-</sup><br>(error, ppm) | Major fragment ions in<br>positive mode (m, z) <sup>b</sup>                                                                                                                                                                                                                                                                    | Major fragment ions in<br>negative mode (m, z) <sup>b</sup>                                                                                                                                               | identification                | Structure<br>type | Source                    | Reference |
|-----|---------------------------------------------------------------|---------|------------------------------------|------------------------------------|--------------------------------------------------------------------------------------------------------------------------------------------------------------------------------------------------------------------------------------------------------------------------------------------------------------------------------|-----------------------------------------------------------------------------------------------------------------------------------------------------------------------------------------------------------|-------------------------------|-------------------|---------------------------|-----------|
| 17  | C <sub>6</sub> H <sub>8</sub> O <sub>7</sub>                  | 3.23    | 193.0336<br>(-3.3)                 | 191.0193<br>(-0.8)                 | 139.0020[M+H-3H <sub>2</sub> O] <sup>+</sup> ,<br>129.0173[M+H-H <sub>2</sub> O-HCOOH] <sup>+</sup> ,<br>111.0073[M+H-2H <sub>2</sub> O-HCOOH] <sup>+</sup> ,<br>68.9967                                                                                                                                                       | 191.0195[M-H] <sup>-</sup> ,<br>111.0087[M-H-2H <sub>2</sub> O-CO <sub>2</sub> ] <sup>-</sup> ,<br>87.0090[M-H-2H <sub>2</sub> O-2CO <sub>2</sub> ] <sup>-</sup> ,                                        | Citric acid <sup>a,c</sup>    | Organic acid      | CH, HQ, DS,<br>SJ, DZ, GC |           |
| 18  | C <sub>9</sub> H <sub>12</sub> N <sub>2</sub> O <sub>6</sub>  | 3.34    | ND                                 | 243.0611<br>(-1.7)                 | ND                                                                                                                                                                                                                                                                                                                             | 243.0613[M-H] <sup>-</sup> ,<br>200.0529[M-H-CO <sub>2</sub> ] <sup>-</sup> ,                                                                                                                             | Uridine <sup>c</sup>          | Glycosides        | CH, HQ, JBX,<br>DS, GC    |           |
| 19  | C <sub>10</sub> H <sub>13</sub> N <sub>5</sub> O <sub>4</sub> | 3.52    | 268.1038<br>(-0.7)                 | ND                                 | 268.1043[M+H] <sup>+</sup> ,<br>136.0614[M+H-C <sub>5</sub> H <sub>9</sub> O <sub>4</sub> ] <sup>+</sup> ,                                                                                                                                                                                                                     | ND                                                                                                                                                                                                        | Adenosine <sup>c</sup>        | Glycosides        | CH, HQ, DS,<br>GC         | [3]       |
| 20  | C <sub>6</sub> H <sub>13</sub> NO <sub>2</sub>                | 3.66    | 132.1014<br>(-2.3)                 | 130.0863<br>(-4.6)                 | 132.1017[M+H] <sup>+</sup> ,<br>86.0960[M+H-HCOOH] <sup>+</sup> ,<br>69.0695[M+H-HCOOH-NH <sub>3</sub> ] <sup>+</sup>                                                                                                                                                                                                          | 130.0860[M-H] <sup>-</sup> ,<br>113.0243[M-H-NH <sub>3</sub> ] <sup>-</sup> ,<br>88.0401[M-HCOOH-NH <sub>3</sub> ] <sup>-</sup> ,                                                                         | Isoleucine                    | Organic acid      | JBX,DS                    | [3]       |
| 21  | C <sub>4</sub> H <sub>6</sub> O <sub>4</sub>                  | 3.75    | ND                                 | 117.0189<br>(-3.6)                 | ND                                                                                                                                                                                                                                                                                                                             | 117.0177[M-H] <sup>-</sup> ,<br>99.0089[M-H-H <sub>2</sub> O] <sup>-</sup> ,<br>73.0287[M-H-CO <sub>2</sub> ] <sup>-</sup> ,                                                                              | Succinic acid <sup>a, c</sup> | Organic acid      | CH, DS                    |           |
| 22  | C <sub>10</sub> H <sub>13</sub> N <sub>5</sub> O <sub>5</sub> | 3.81    | 284.0990<br>(0.1)                  | 282.0836<br>(-2.7)                 | 284.1239[M+H] <sup>+</sup> ,<br>152.0564[M+H-C <sub>5</sub> H <sub>9</sub> O <sub>4</sub> ] <sup>+</sup> ,<br>135.0292[M+H-C <sub>5</sub> H <sub>9</sub> O <sub>4</sub> -NH <sub>3</sub> ] <sup>+</sup> ,<br>88.0749[M+H-C <sub>5</sub> H <sub>9</sub> O <sub>4</sub> -NH <sub>3</sub> -<br>CH <sub>2</sub> NO] <sup>+</sup> , | 282.0829[M-H] <sup>-</sup> ,<br>150.0413[M-H-C <sub>5</sub> H <sub>9</sub> O <sub>4</sub> ] <sup>-</sup> ,<br>133.0143[M-H-C <sub>5</sub> H <sub>9</sub> O <sub>4</sub> -NH <sub>3</sub> ] <sup>-</sup> , | Guanosine <sup>c</sup>        | Glycosides        | CH, HQ, JBX,<br>DS        |           |
| 23  | C <sub>9</sub> H <sub>11</sub> NO <sub>2</sub>                | 5.37    | 166.0860<br>(-1.7)                 | 164.0709<br>(-3.2)                 | 166.0861[M+H] <sup>+</sup> ,<br>120.0799[M+H-HCOOH] <sup>+</sup> ,<br>103.0533[M+H-HCOOH-NH <sub>3</sub> ] <sup>+</sup> ,                                                                                                                                                                                                      | 164.8333[M-H] <sup>-</sup> ,<br>147.0429[M-H-NH <sub>3</sub> ] <sup>-</sup> ,<br>120.9367[M-H-CO <sub>2</sub> ] <sup>-</sup> ,<br>103.0563[M-H-NH <sub>3</sub> -CO <sub>2</sub> ] <sup>-</sup> ,          | Phenylalanine <sup>a, c</sup> | Organic acid      | HQ, JBX                   |           |
| 24  | C <sub>14</sub> H <sub>21</sub> NO <sub>4</sub>               | 6.02    | 268.1540<br>(-0.3)                 | ND                                 | 268.1530[M+H] <sup>+</sup> ,<br>161.0589[M+H-C <sub>4</sub> H <sub>11</sub> NO-H <sub>2</sub> O] <sup>+</sup> ,<br>88.0750                                                                                                                                                                                                     | ND                                                                                                                                                                                                        | Codonopsine                   | Alkaloids         | DS                        | [4]       |

| No. | formula                                         | tr, min | [M+H] <sup>+</sup><br>(error, ppm) | [M-H] <sup>-</sup><br>(error, ppm) | Major fragment ions in<br>positive mode (m, z) <sup>b</sup>                                                                                                                                                                                                                                                                                                                                                                            | Major fragment ions in<br>negative mode (m, z) <sup>b</sup>                                                                                                                                                                                                                                                                                                                                   | identification                                           | Structure<br>type    | Source     | Reference |
|-----|-------------------------------------------------|---------|------------------------------------|------------------------------------|----------------------------------------------------------------------------------------------------------------------------------------------------------------------------------------------------------------------------------------------------------------------------------------------------------------------------------------------------------------------------------------------------------------------------------------|-----------------------------------------------------------------------------------------------------------------------------------------------------------------------------------------------------------------------------------------------------------------------------------------------------------------------------------------------------------------------------------------------|----------------------------------------------------------|----------------------|------------|-----------|
| 25  | C <sub>16</sub> H <sub>18</sub> O <sub>9</sub>  | 7.78    | 355.1012<br>(-3.1)                 | 353.0851<br>(-6.4)                 | 163.0385[M+H-C <sub>7</sub> H <sub>11</sub> O <sub>6</sub> ] <sup>+</sup> ,<br>145.0265[M+H-C <sub>9</sub> H <sub>7</sub> O <sub>3</sub> -HCOOH]<br>135.0401[M+H-C <sub>8</sub> H <sub>11</sub> O <sub>7</sub> ] <sup>+</sup> ,                                                                                                                                                                                                        | 353.0857[M-H] <sup>-</sup> ,<br>191.0550[M-H-C <sub>9</sub> H <sub>7</sub> O <sub>3</sub> ] <sup>-</sup> ,<br>179.0345[M-H-C <sub>7</sub> H <sub>11</sub> O <sub>5</sub> ] <sup>-</sup> ,<br>173.0461[M-H-C <sub>9</sub> H <sub>7</sub> O <sub>3</sub> -H <sub>2</sub> O] <sup>-</sup> ,<br>135.0439[M-H-C <sub>7</sub> H <sub>11</sub> O <sub>5</sub> -<br>CHO <sub>2</sub> ] <sup>-</sup> , | Neochlorogenic acid <sup>a</sup>                         | Phenylpropa<br>noids | CH         |           |
| 26  | C <sub>7</sub> H <sub>6</sub> O <sub>3</sub>    | 9.44    | ND                                 | 137.0238<br>(-3.8)                 | ND                                                                                                                                                                                                                                                                                                                                                                                                                                     | 137.0228[M-H] <sup>-</sup> ,<br>119.0157[M-H-H <sub>2</sub> O] <sup>-</sup> ,                                                                                                                                                                                                                                                                                                                 | Protocatechuic<br>aldehyde <sup>c</sup>                  | Phenolic<br>acids    | GC         |           |
| 27  | C <sub>9</sub> H <sub>10</sub> O <sub>3</sub>   | 9.55    | ND                                 | 165.0553<br>(-1.3)                 | ND                                                                                                                                                                                                                                                                                                                                                                                                                                     | 165.0560[M-H] <sup>-</sup> ,<br>121.0653[M+COOH] <sup>-</sup> ,<br>93.0352[M+COOH-C <sub>2</sub> H <sub>4</sub> ] <sup>-</sup> ,<br>59.0130                                                                                                                                                                                                                                                   | Desaminotyrosine <sup>c</sup>                            | Phenylpropa<br>noids | GC         |           |
| 28  | C <sub>16</sub> H <sub>18</sub> O <sub>9</sub>  | 9.97    | 355.1022<br>(-0.3)                 | 353.0855<br>(-6.6)                 | 163.0376[M+H-C <sub>7</sub> H <sub>11</sub> O <sub>6</sub> ] <sup>+</sup> ,<br>145.0280[M+H-C <sub>9</sub> H <sub>7</sub> O <sub>3</sub> -HCOOH]<br>135.0429[M+H-C <sub>8</sub> H <sub>11</sub> O <sub>7</sub> ] <sup>+</sup> ,                                                                                                                                                                                                        | 353.0860[M-H] <sup>-</sup> ,<br>191.0549[M-H-C <sub>9</sub> H <sub>7</sub> O <sub>3</sub> ] <sup>-</sup> ,                                                                                                                                                                                                                                                                                    | Chlorogenic acid <sup>a, c</sup>                         | Phenylpropa<br>noids | CH, HQ     |           |
| 29  | C <sub>21</sub> H <sub>22</sub> O <sub>9</sub>  | 10.34   | 419.1338<br>(0.2)                  | ND                                 | 257.0794[M+H-Glc] <sup>+</sup> ,                                                                                                                                                                                                                                                                                                                                                                                                       | ND                                                                                                                                                                                                                                                                                                                                                                                            | Isomer of liquiritin                                     | Flavonoids           | GC         | [1]       |
| 30  | C <sub>27</sub> H <sub>30</sub> O <sub>15</sub> | 11.4    | 595.1634<br>(-1.3)                 | 593.1482<br>(-4.8)                 | 595.1641,<br>577.1126[M+H-H <sub>2</sub> O] <sup>+</sup> ,<br>559.1375[M+H-2H <sub>2</sub> O] <sup>+</sup> ,<br>457.1091[M+H-H <sub>2</sub> O-C <sub>4</sub> H <sub>8</sub> O <sub>4</sub> ] <sup>+</sup> ,<br>427.1029[M+H-H <sub>2</sub> O-C <sub>5</sub> H <sub>10</sub> O <sub>5</sub> ] <sup>+</sup> ,<br>325.0767[M+H-C <sub>5</sub> H <sub>10</sub> O <sub>5</sub> -C <sub>4</sub> H <sub>8</sub> O <sub>4</sub> ] <sup>+</sup> | 593.1483,<br>473.1060[M-H-C <sub>4</sub> H <sub>8</sub> O <sub>4</sub> ] <sup>-</sup> ,<br>353.0645[M-H-2C <sub>4</sub> H <sub>8</sub> O <sub>4</sub> ] <sup>-</sup>                                                                                                                                                                                                                          | Vicenin-2 (Apigenin-<br>6,8-di-C-glucoside) <sup>b</sup> | Flavonoids           | HQ,        | [5]       |
| 31  | C <sub>9</sub> H <sub>8</sub> O <sub>4</sub>    | 11.45   | ND                                 | 179.0344<br>(-3.2)                 | ND                                                                                                                                                                                                                                                                                                                                                                                                                                     | 179.0342[M-H] <sup>-</sup> ,<br>135.0449[M-H-CO <sub>2</sub> ] <sup>-</sup> ,                                                                                                                                                                                                                                                                                                                 | Caffeic acid <sup>a</sup>                                | Phenolic<br>acids    | CH, GC, HQ |           |

| No. | formula                                         | tr, min | [M+H] <sup>+</sup><br>(error, ppm) | [M-H] <sup>-</sup><br>(error, ppm) | Major fragment ions in<br>positive mode (m, z) <sup>b</sup>                                                                                                                                                                                                                                                                                                                                                                                                                                                                                                                                           | Major fragment ions in<br>negative mode (m, z) <sup>b</sup>                                                                                                                                                                                                                                                                                                                                                                                              | identification                 | Structure<br>type | Source | Reference |
|-----|-------------------------------------------------|---------|------------------------------------|------------------------------------|-------------------------------------------------------------------------------------------------------------------------------------------------------------------------------------------------------------------------------------------------------------------------------------------------------------------------------------------------------------------------------------------------------------------------------------------------------------------------------------------------------------------------------------------------------------------------------------------------------|----------------------------------------------------------------------------------------------------------------------------------------------------------------------------------------------------------------------------------------------------------------------------------------------------------------------------------------------------------------------------------------------------------------------------------------------------------|--------------------------------|-------------------|--------|-----------|
| 32  | C <sub>26</sub> H <sub>28</sub> O <sub>14</sub> | 12.67   | 565.155<br>(-0.4)                  | 563.1374<br>(-5.6)                 | 565.1524[M+H] <sup>+</sup> ,<br>547.1394[M+H-H <sub>2</sub> O] <sup>+</sup> ,<br>529.1295[M+H-2H <sub>2</sub> O] <sup>+</sup> ,<br>511.1207[M+H-3H <sub>2</sub> O] <sup>+</sup> ,<br>481.1100[M+H-3H <sub>2</sub> O-2CH <sub>2</sub> O] <sup>+</sup> ,<br>427.1004[M+H-H <sub>2</sub> O-C <sub>4</sub> H <sub>8</sub> O <sub>4</sub> ] <sup>+</sup> ,<br>409.0909[M+H-2H <sub>2</sub> O-C <sub>4</sub> H <sub>8</sub> O <sub>4</sub> ] <sup>+</sup> ,<br>379.0801[M+H-2H <sub>2</sub> O-C <sub>4</sub> H <sub>8</sub> O <sub>4</sub> -<br>2CH <sub>2</sub> O] <sup>+</sup> ,                          | 563.1354[M-H] <sup>-</sup> ,<br>473.1079[M-H-C <sub>3</sub> H <sub>6</sub> O <sub>3</sub> ] <sup>-</sup> ,<br>443.0963[M-H-C <sub>4</sub> H <sub>8</sub> O <sub>4</sub> ] <sup>-</sup> ,<br>383.0732[M-H-C <sub>4</sub> H <sub>8</sub> O <sub>4</sub> -<br>C <sub>2</sub> H <sub>4</sub> O <sub>2</sub> ] <sup>-</sup> ,<br>353.0662[M-H-C <sub>3</sub> H <sub>6</sub> O <sub>3</sub> -<br>C <sub>4</sub> H <sub>8</sub> O <sub>4</sub> ] <sup>-</sup> , | Schaftoside <sup>a, c</sup>    | Flavonoids        | HQ, GC | [6]       |
| 33  | C <sub>21</sub> H <sub>20</sub> O <sub>9</sub>  | 12.97   | 417.1167<br>(-3.1)                 | ND                                 | 417.1190<br>255.0655[M+H-Glc] <sup>+</sup>                                                                                                                                                                                                                                                                                                                                                                                                                                                                                                                                                            | ND                                                                                                                                                                                                                                                                                                                                                                                                                                                       | Sophoraflavone B               | Flavonoids        | GC     | [6]       |
| 34  | C <sub>26</sub> H <sub>28</sub> O <sub>14</sub> | 13.17   | 565.1542<br>(-1.7)                 | 563.1366<br>(-5.8)                 | 565.1578[M+H] <sup>+</sup> ,<br>547.1413[M+H-H <sub>2</sub> O] <sup>+</sup> ,<br>529.1316[M+H-2H <sub>2</sub> O] <sup>+</sup> ,<br>481.1199[M+H-3H <sub>2</sub> O-CH <sub>2</sub> O] <sup>+</sup> ,<br>457.1180[M+H-H <sub>2</sub> O-C <sub>3</sub> H <sub>6</sub> O <sub>3</sub> ] <sup>+</sup> ,<br>427.1149[M+H-H <sub>2</sub> O-C <sub>4</sub> H <sub>8</sub> O <sub>4</sub> ] <sup>+</sup> ,<br>397.0939[M+H-H <sub>2</sub> O-C <sub>4</sub> H <sub>8</sub> O <sub>4</sub> -<br>CH <sub>2</sub> O] <sup>+</sup> ,<br>325.0721[M+H-2C <sub>4</sub> H <sub>8</sub> O <sub>4</sub> ] <sup>+</sup> , | 563.1358[M-H] <sup>-</sup> ,<br>473.1205[M-H-C <sub>3</sub> H <sub>6</sub> O <sub>3</sub> ] <sup>-</sup> ,<br>443.0925[M-H-C <sub>4</sub> H <sub>8</sub> O <sub>4</sub> ] <sup>-</sup> ,<br>383.0741[M-H-C <sub>4</sub> H <sub>8</sub> O <sub>4</sub> -<br>C <sub>2</sub> H <sub>4</sub> O <sub>2</sub> ] <sup>-</sup> ,<br>353.0647[M-H-C <sub>3</sub> H <sub>6</sub> O <sub>3</sub> -<br>C <sub>4</sub> H <sub>8</sub> O <sub>4</sub> ] <sup>-</sup> , | Isoschaftoside <sup>a, c</sup> | Flavonoids        | HQ, GC |           |
| 35  | C <sub>27</sub> H <sub>30</sub> O <sub>14</sub> | 13.35   | ND                                 | 577.1527<br>(-6.1)                 | ND                                                                                                                                                                                                                                                                                                                                                                                                                                                                                                                                                                                                    | 577.1513[M-H] <sup>-</sup> ,<br>457.1140[M-H-C <sub>4</sub> H <sub>8</sub> O <sub>4</sub> ] <sup>-</sup> ,<br>337.0685[M-H-2C <sub>4</sub> H <sub>8</sub> O <sub>4</sub> ] <sup>-</sup>                                                                                                                                                                                                                                                                  | Chrysin-6,8-di-C-<br>glucoside | Flavonoids        | HQ     | [7]       |

| No. | formula                                         | tr, min | [M+H] <sup>+</sup><br>(error, ppm) | [M-H] <sup>-</sup><br>(error, ppm) | Major fragment ions in<br>positive mode (m, z) <sup>b</sup>                                                                                                                                                                     | Major fragment ions in<br>negative mode (m, z) <sup>b</sup>                                                                                                                                                                                | identification                              | Structure<br>type | Source     | Reference |
|-----|-------------------------------------------------|---------|------------------------------------|------------------------------------|---------------------------------------------------------------------------------------------------------------------------------------------------------------------------------------------------------------------------------|--------------------------------------------------------------------------------------------------------------------------------------------------------------------------------------------------------------------------------------------|---------------------------------------------|-------------------|------------|-----------|
| 36  | C <sub>27</sub> H <sub>32</sub> O <sub>14</sub> | 13.75   | 581.1846<br>(-0.1)                 | ND                                 | 581.1871[M+H] <sup>+</sup> ,<br>419.1337[M+H-Glc] <sup>+</sup> ,<br>257.0808[M+H-2Glc] <sup>+</sup> ,                                                                                                                           | ND                                                                                                                                                                                                                                         | Glucoliquiritin                             | Flavonoids        | GC         | [6,8]     |
| 37  | C <sub>27</sub> H <sub>30</sub> O <sub>14</sub> | 14.08   | 579.1700<br>(-1.5)                 | 577.1530<br>(-5.7)                 | 579.1665[M+H] <sup>+</sup> ,<br>561.1592[M+H-H <sub>2</sub> O] <sup>+</sup> ,<br>543.1511[M+H-2H <sub>2</sub> O] <sup>+</sup> ,<br>423.1077[M+H-2H <sub>2</sub> O-C <sub>7</sub> H <sub>5</sub> O <sub>2</sub> ] <sup>+</sup> , | 577.1510[M-H] <sup>-</sup> ,<br>457.1161[M-H- C <sub>4</sub> H <sub>8</sub> O <sub>4</sub> ] <sup>-</sup> ,<br>383.0722[M-H- C <sub>4</sub> H <sub>8</sub> O <sub>4</sub> -<br>C <sub>3</sub> H <sub>6</sub> O <sub>2</sub> ] <sup>-</sup> | Isoviolanthin                               | Flavonoids        | GC         | [6,9]     |
| 38  | C <sub>22</sub> H <sub>22</sub> O <sub>10</sub> | 14.36   | 447.1287<br>(0.4)                  | ND                                 | 447.1288[M+H] <sup>+</sup><br>285.0752[M+H-Glc] <sup>+</sup> ,<br>270.0612[M+H-Glc-CH <sub>3</sub> ] <sup>+</sup> ,                                                                                                             | ND                                                                                                                                                                                                                                         | Calycosin-7-o-<br>glucoside <sup>a, c</sup> | Flavonoids        | GC         |           |
| 39  | C <sub>27</sub> H <sub>30</sub> O <sub>16</sub> | 14.6    | 611.1593<br>(-0.7)                 | 609.1026<br>(-5.8)                 | 611.1654[M+H] <sup>+</sup> ,<br>465.1046[M+H-C <sub>6</sub> H <sub>11</sub> O <sub>4</sub> ] <sup>+</sup> ,<br>303.0499[M+H-C <sub>12</sub> H <sub>21</sub> O <sub>9</sub> ] <sup>+</sup> ,                                     | 609.1435[M-H] <sup>-</sup> ,<br>300.0262[M-H-C <sub>12</sub> H <sub>21</sub> O <sub>9</sub> ] <sup>-</sup> ,                                                                                                                               | Rutin <sup>a, c</sup>                       | Flavonoids        | CH, DZ, GC |           |
| 40  | C <sub>21</sub> H <sub>22</sub> O <sub>9</sub>  | 14.62   | 419.1329<br>(-1.9)                 | 417.1158<br>(-7.4)                 | 257.0809[M+H-Glc] <sup>+</sup> ,<br>137.0229[M+H-Glc-C <sub>7</sub> H <sub>5</sub> O <sub>2</sub> ] <sup>+</sup> ,                                                                                                              | 417.1188[M-H] <sup>-</sup> ,<br>255.0649[M-H-Glc] <sup>-</sup> ,<br>135.0069[M-H-Glc-C <sub>7</sub> H <sub>5</sub> O <sub>2</sub> ] <sup>-</sup> ,<br>119.0497                                                                             | Neoliquiritin                               | Flavonoids        | GC         | [10-12]   |
| 41  | C <sub>15</sub> H <sub>12</sub> O <sub>4</sub>  | 14.72   | 257.0806<br>(-0.7)                 | ND                                 | 257.0815[M+H] <sup>+</sup> ,<br>147.0429[M+H-C <sub>6</sub> H <sub>5</sub> O <sub>2</sub> ] <sup>+</sup> ,<br>137.0224[M+H-C <sub>8</sub> H <sub>7</sub> O] <sup>+</sup> ,                                                      | ND                                                                                                                                                                                                                                         | Isomer of<br>isoliquiritigenin <sup>c</sup> | Flavonoids        | GC         |           |
| 42  | C <sub>26</sub> H <sub>30</sub> O <sub>13</sub> | 14.74   | 551.1744<br>(-2.8)                 | 549.1571<br>(-7)                   | 257.0807[M+H-Api-Glc] <sup>+</sup> ,                                                                                                                                                                                            | 549.1563[M-H] <sup>-</sup> ,<br>255.0659[M-H-Api-Glc] <sup>-</sup> ,                                                                                                                                                                       | Liquiritin apioside <sup>a</sup>            | Flavonoids        | GC         |           |
| 43  | C <sub>15</sub> H <sub>12</sub> O <sub>4</sub>  | 15.00   | 257.0805<br>(-0.8)                 | ND                                 | 257.0807[M+H] <sup>+</sup><br>147.0432[M+H-C <sub>6</sub> H <sub>5</sub> O <sub>2</sub> ] <sup>+</sup> ,<br>137.0228[M+H-C <sub>8</sub> H <sub>7</sub> O] <sup>+</sup> ,                                                        | ND                                                                                                                                                                                                                                         | Isomer of<br>liquiritigenin <sup>c</sup>    | Flavonoids        | GC         |           |



| No. | formula                                         | tr, min | [M+H] <sup>+</sup><br>(error, ppm) | [M-H] <sup>-</sup><br>(error, ppm) | Major fragment ions in<br>positive mode (m, z) <sup>b</sup>                                                                                                                                                                                                                             | Major fragment ions in<br>negative mode (m, z) <sup>b</sup>                                                                                                                                                                                                                                                             | identification                                         | Structure<br>type | Source | Reference |
|-----|-------------------------------------------------|---------|------------------------------------|------------------------------------|-----------------------------------------------------------------------------------------------------------------------------------------------------------------------------------------------------------------------------------------------------------------------------------------|-------------------------------------------------------------------------------------------------------------------------------------------------------------------------------------------------------------------------------------------------------------------------------------------------------------------------|--------------------------------------------------------|-------------------|--------|-----------|
| 44  | C <sub>21</sub> H <sub>22</sub> O <sub>9</sub>  | 15.01   | 419.1321<br>(-3.0)                 | 417.1160<br>(-6.7)                 | 257.0801[M+H-Glc] <sup>+</sup> ,<br>137.0218[M+H-Glc-C <sub>8</sub> H <sub>7</sub> O] <sup>+</sup> ,                                                                                                                                                                                    | 417.1164[M-H] <sup>-</sup> ,<br>255.0657[M-H-Glc] <sup>-</sup> ,<br>135.0086[M-H-Glc-C <sub>8</sub> H <sub>7</sub> O] <sup>-</sup> ,                                                                                                                                                                                    | Liquiritin <sup>a, c</sup>                             | Flavonoids        | GC     |           |
| 45  | C <sub>29</sub> H <sub>36</sub> O <sub>15</sub> | 15.02   | ND                                 | 623.1947<br>(-5.6)                 | ND                                                                                                                                                                                                                                                                                      | 623.1940[M-H] <sup>-</sup> ,<br>461.1611[M-H-Glc] <sup>-</sup> ,<br>161.0234                                                                                                                                                                                                                                            | Acteoside <sup>c</sup>                                 | Phenylpropanoids  | HQ, GC |           |
| 46  | C <sub>21</sub> H <sub>20</sub> O <sub>12</sub> | 15.14   | 465.1018<br>(-2.0)                 | 463.0852<br>(-6.5)                 | 465.0951[M+H] <sup>+</sup> ,<br>289.0698[M+H-C <sub>6</sub> H <sub>8</sub> O <sub>6</sub> ] <sup>+</sup> ,<br>169.0116[M+H-C <sub>6</sub> H <sub>8</sub> O <sub>6</sub> -C <sub>8</sub> H <sub>8</sub> O] <sup>+</sup> ,                                                                | 417.1171[M+COOH] <sup>-</sup> ,<br>255.0655[M-H-HCOOH-Glc] <sup>-</sup> ,<br>135.0081[M-H-HCOOH-Glc-C <sub>8</sub> H <sub>7</sub> O] <sup>-</sup> ,                                                                                                                                                                     | Viscidulin I, 2'-O-glucoside                           | Flavonoids        | HQ     | [13]      |
| 47  | C <sub>21</sub> H <sub>18</sub> O <sub>12</sub> | 15.6    | 463.0864<br>(-1.5)                 | 461.0696<br>(-6.4)                 | 463.0865[M+H] <sup>+</sup> ,<br>287.0548[M+H-C <sub>6</sub> H <sub>8</sub> O <sub>6</sub> ] <sup>+</sup> ,                                                                                                                                                                              | 461.0672[M-H] <sup>-</sup> ,<br>285.0396[M-H-C <sub>6</sub> H <sub>8</sub> O <sub>6</sub> ] <sup>-</sup> ,                                                                                                                                                                                                              | Scutellarin <sup>a</sup>                               | Flavonoids        | HQ     |           |
| 48  | C <sub>21</sub> H <sub>20</sub> O <sub>12</sub> | 15.88   | 465.1024<br>(-0.8)                 | 463.0848<br>(-7.2)                 | 465.1087[M+H] <sup>+</sup> ,<br>289.0699[M+H-C <sub>6</sub> H <sub>8</sub> O <sub>6</sub> ] <sup>+</sup> ,<br>169.0136[M+H-C <sub>6</sub> H <sub>8</sub> O <sub>6</sub> -C <sub>8</sub> H <sub>8</sub> O] <sup>+</sup> ,                                                                | 463.0817[M-H] <sup>-</sup> ,<br>287.0537[M-H-C <sub>6</sub> H <sub>8</sub> O <sub>6</sub> ] <sup>-</sup> ,<br>269.0432[M-H-C <sub>6</sub> H <sub>8</sub> O <sub>6</sub> -H <sub>2</sub> O] <sup>-</sup> ,<br>166.9969[M-H-C <sub>6</sub> H <sub>8</sub> O <sub>6</sub> -C <sub>8</sub> H <sub>8</sub> O] <sup>-</sup> , | Carthamidin-7-O-glucuronide                            | Flavonoids        | HQ     | [14]      |
| 49  | C <sub>27</sub> H <sub>30</sub> O <sub>15</sub> | 16.43   | 595.1634<br>(-0.6)                 | ND                                 | 595.1688[M+H] <sup>+</sup> ,<br>433.1116[M+H-Glc] <sup>+</sup> ,<br>271.0596[M+H-2Glc] <sup>+</sup> ,                                                                                                                                                                                   | ND                                                                                                                                                                                                                                                                                                                      | Oroxin B <sup>c</sup>                                  | Flavonoids        | HQ     |           |
| 50  | C <sub>23</sub> H <sub>24</sub> O <sub>12</sub> | 16.56   | 493.1325<br>(-2.2)                 | ND                                 | 493.1290[M+H] <sup>+</sup><br>331.0795[M+H-Glc] <sup>+</sup> ,                                                                                                                                                                                                                          | ND                                                                                                                                                                                                                                                                                                                      | 5,2',6'-Trihydroxy-7,8-dimethoxyflavone 2'-O-glucoside | Flavonoids        | HQ     | [15]      |
| 51  | C <sub>21</sub> H <sub>20</sub> O <sub>9</sub>  | 16.8    | 417.1173<br>(-1.6)                 | 415.1011<br>(-5.6)                 | 417.1176,<br>399.1053[M+H-H <sub>2</sub> O] <sup>+</sup> ,<br>381.0955[M+H-2H <sub>2</sub> O] <sup>+</sup> ,<br>297.0748[M+H-C <sub>4</sub> H <sub>8</sub> O <sub>4</sub> ] <sup>+</sup> ,<br>279.0661[M+H-H <sub>2</sub> O-C <sub>4</sub> H <sub>8</sub> O <sub>4</sub> ] <sup>+</sup> | 415.1016,<br>295.0607[M-H-C <sub>4</sub> H <sub>8</sub> O <sub>4</sub> ] <sup>-</sup> ,<br>267.0662[M-H-C <sub>4</sub> H <sub>8</sub> O <sub>4</sub> -CO] <sup>-</sup>                                                                                                                                                  | Chrysin 8-C-glucoside <sup>c</sup>                     | Flavonoids        | HQ     | [5,16]    |

| No. | formula                                         | tr, min | [M+H] <sup>+</sup><br>(error, ppm) | [M-H] <sup>-</sup><br>(error, ppm) | Major fragment ions in<br>positive mode (m, z) <sup>b</sup>                                                                                                                                             | Major fragment ions in<br>negative mode (m, z) <sup>b</sup>                                                                                                                                                                                                                                                                                                                                                | identification                                     | Structure<br>type | Source | Reference |
|-----|-------------------------------------------------|---------|------------------------------------|------------------------------------|---------------------------------------------------------------------------------------------------------------------------------------------------------------------------------------------------------|------------------------------------------------------------------------------------------------------------------------------------------------------------------------------------------------------------------------------------------------------------------------------------------------------------------------------------------------------------------------------------------------------------|----------------------------------------------------|-------------------|--------|-----------|
| 52  | C <sub>21</sub> H <sub>22</sub> O <sub>10</sub> | 17.43   | ND                                 | 433.1108<br>(-4.7)                 | ND                                                                                                                                                                                                      | 433.1113<br>271.0600[M-H-Glc] <sup>-</sup> ,<br>151.0020[M-H-Glc-C <sub>7</sub> H <sub>4</sub> O <sub>2</sub> ] <sup>-</sup>                                                                                                                                                                                                                                                                               | 5-Hydroxylliquiritin                               | Flavonoids        | GC     | [17]      |
| 53  | C <sub>20</sub> H <sub>28</sub> O <sub>8</sub>  | 18.01   | ND                                 | 441.1740<br>(-3.5)                 | ND                                                                                                                                                                                                      | 441.1735[M+COOH] <sup>+</sup> ,<br>215.1064[M-H-C <sub>6</sub> H <sub>12</sub> O <sub>6</sub> ] <sup>-</sup> ,<br>179.0549[M-H-C <sub>14</sub> H <sub>16</sub> O <sub>2</sub> ] <sup>-</sup> ,<br>143.0719[C <sub>7</sub> H <sub>11</sub> O <sub>3</sub> ] <sup>-</sup> ,<br>89.0217[M-H-C <sub>6</sub> H <sub>11</sub> O <sub>5</sub> -<br>C <sub>7</sub> H <sub>12</sub> O <sub>3</sub> ] <sup>-</sup> , | Lobetyolin <sup>a</sup>                            | Glycosides        | DS     | [4]       |
| 54  | C <sub>22</sub> H <sub>20</sub> O <sub>12</sub> | 18.18   | 477.1007<br>(-2.5)                 | 475.0847<br>(-7.3)                 | 477.0995[M+H] <sup>+</sup> ,<br>301.0694[M+H-C <sub>6</sub> H <sub>8</sub> O <sub>6</sub> ] <sup>+</sup> ,<br>286.0463[M+H-C <sub>6</sub> H <sub>8</sub> O <sub>6</sub> -CH <sub>3</sub> ] <sup>+</sup> | 475.0829[M-H] <sup>-</sup> ,<br>299.0550[M-H-C <sub>6</sub> H <sub>8</sub> O <sub>6</sub> ] <sup>-</sup> ,<br>284.0326[M-H-C <sub>6</sub> H <sub>8</sub> O <sub>6</sub> -CH <sub>3</sub> ] <sup>-</sup> ,<br>175.0257[M-H-C <sub>16</sub> H <sub>12</sub> O <sub>6</sub> ] <sup>-</sup>                                                                                                                    | 5,7,2'-Trihydroxy-6-methoxyflavone-7-O-glucuronide | Flavonoids        | HQ     | [5]       |
| 55  | C <sub>21</sub> H <sub>22</sub> O <sub>9</sub>  | 18.48   | 419.1329<br>(-1.7)                 | ND                                 | 419.1469[M+H] <sup>+</sup> ,<br>257.0811[M+H-Glc] <sup>+</sup> ,<br>239.0649[M+H-Glc-H <sub>2</sub> O] <sup>+</sup> ,<br>149.0234, 137.0219                                                             | ND                                                                                                                                                                                                                                                                                                                                                                                                         | Isomer of liquiritin                               | Flavonoids        | GC     | [18]      |
| 56  | C <sub>26</sub> H <sub>30</sub> O <sub>13</sub> | 18.49   | 551.1738<br>(-3.9)                 | 549.1575<br>(-6.4)                 | 419.1327[M+H-Api] <sup>+</sup> ,<br>257.0807[M+H-Api-Glc] <sup>+</sup> ,<br>137.0227[M+H-Api-Glc-C <sub>7</sub> H <sub>5</sub> O <sub>2</sub> ] <sup>+</sup> ,                                          | 549.1570[M-H] <sup>-</sup> ,<br>255.0642[M-H-Api-Glc] <sup>-</sup> ,<br>135.0081[M-H-Api-Glc-C <sub>7</sub> H <sub>5</sub> O <sub>2</sub> ] <sup>-</sup> ,                                                                                                                                                                                                                                                 | Isoliquiritin apioside                             | Flavonoids        | GC     | [10]      |
| 57  | C <sub>26</sub> H <sub>30</sub> O <sub>13</sub> | 18.84   | 551.1732<br>(-3.2)                 | 549.1577<br>(-6.7)                 | 551.1738[M+H] <sup>+</sup> ,<br>419.1325[M+H-Api] <sup>+</sup> ,<br>257.0796[M+H-Api-Glc] <sup>+</sup> ,<br>137.0210[M+H-Api-Glc-C <sub>7</sub> H <sub>5</sub> O <sub>2</sub> ] <sup>+</sup> ,          | 549.1563[M-H] <sup>-</sup> ,<br>429.1024[M-H-C <sub>7</sub> H <sub>5</sub> O <sub>2</sub> ] <sup>-</sup> ,<br>255.0637[M-H-Api-Glc] <sup>-</sup> ,                                                                                                                                                                                                                                                         | Liquiritigenin-7-O-D-apiosyl-4'-O-D-glucoside      | Flavonoids        | GC     | [10]      |
| 58  | C <sub>22</sub> H <sub>22</sub> O <sub>9</sub>  | 19.06   | 431.1324<br>(-3.0)                 |                                    | 269.0803[M+H-Glc] <sup>+</sup> ,                                                                                                                                                                        | ND                                                                                                                                                                                                                                                                                                                                                                                                         | Ononin <sup>c</sup>                                | Flavonoids        | GC     | [18]      |

| No. | formula                                         | tr, min | [M+H] <sup>+</sup><br>(error, ppm) | [M-H] <sup>-</sup><br>(error, ppm) | Major fragment ions in<br>positive mode (m, z) <sup>b</sup>                                                                                                                                                                                                                                                                                                                                | Major fragment ions in<br>negative mode (m, z) <sup>b</sup>                                                                                                                                                                                            | identification                            | Structure<br>type       | Source | Reference |
|-----|-------------------------------------------------|---------|------------------------------------|------------------------------------|--------------------------------------------------------------------------------------------------------------------------------------------------------------------------------------------------------------------------------------------------------------------------------------------------------------------------------------------------------------------------------------------|--------------------------------------------------------------------------------------------------------------------------------------------------------------------------------------------------------------------------------------------------------|-------------------------------------------|-------------------------|--------|-----------|
| 59  | C <sub>15</sub> H <sub>10</sub> O <sub>6</sub>  | 19.13   | 287.0542<br>(-1.2)                 | 285.0384<br>(-5.3)                 | 287.0540[M+H] <sup>+</sup> ,<br>269.0432[M+H-H <sub>2</sub> O] <sup>+</sup> ,<br>241.0489[M+H-H <sub>2</sub> O-CO] <sup>+</sup> ,<br>153.0162[M+H-C <sub>8</sub> H <sub>6</sub> O <sub>2</sub> ] <sup>+</sup> ,<br>139.0014[M+H-C <sub>9</sub> H <sub>6</sub> O <sub>2</sub> ] <sup>+</sup> ,                                                                                              | 285.0391[M-H] <sup>-</sup> ,<br>151.0024[M-H-C <sub>8</sub> H <sub>6</sub> O <sub>2</sub> ] <sup>-</sup> ,<br>107.0142[M-H-C <sub>8</sub> H <sub>6</sub> O <sub>2</sub> -CO <sub>2</sub> ] <sup>-</sup> ,                                              | Scutellarein                              | Flavonoids              | HQ     | [5]       |
| 60  | C <sub>21</sub> H <sub>20</sub> O <sub>9</sub>  | 19.17   | 417.1160<br>(-0.5)                 | 415.1030<br>(-1.2)                 | 417.1166,<br>381.0976[M+H-2H <sub>2</sub> O] <sup>+</sup> ,<br>351.0848[M+H-2H <sub>2</sub> O-CH <sub>2</sub> O] <sup>+</sup> ,<br>321.0786[M+H-2H <sub>2</sub> O-C <sub>2</sub> H <sub>4</sub> O <sub>2</sub> ] <sup>+</sup> ,<br>297.0746[M+H-C <sub>4</sub> H <sub>8</sub> O <sub>4</sub> ] <sup>+</sup> ,<br>267.0635[M+H-C <sub>5</sub> H <sub>10</sub> O <sub>5</sub> ] <sup>+</sup> | 415.1003,<br>325.0710[M-H-C <sub>3</sub> H <sub>6</sub> O <sub>3</sub> ] <sup>-</sup> ,<br>295.0572[M-H-C <sub>4</sub> H <sub>8</sub> O <sub>4</sub> ] <sup>-</sup> ,<br>267.0645[M-H-C <sub>4</sub> H <sub>8</sub> O <sub>4</sub> -CO] <sup>-</sup> , | Chrysin 6-C-glucoside                     | Flavonoids              | HQ     | [5,16]    |
| 61  | C <sub>21</sub> H <sub>18</sub> O <sub>12</sub> | 19.24   | 463.0854<br>(0.6)                  | ND                                 | 287.0532[M+H-C <sub>6</sub> H <sub>8</sub> O <sub>6</sub> ] <sup>+</sup> ,<br>269.0432[M+H-C <sub>6</sub> H <sub>8</sub> O <sub>6</sub> -H <sub>2</sub> O] <sup>+</sup> ,<br>241.0468                                                                                                                                                                                                      | ND                                                                                                                                                                                                                                                     | Luteolin-7-O-β-D-glucuronide <sup>c</sup> | Flavonoids              | HQ     | [19]      |
| 62  | C <sub>21</sub> H <sub>18</sub> O <sub>11</sub> | 19.26   | 447.0904<br>(-3.5)                 | 445.0745<br>(-6.8)                 | 447.0885[M+H] <sup>+</sup> ,<br>271.0583[M+H-C <sub>6</sub> H <sub>8</sub> O <sub>6</sub> ] <sup>+</sup> ,                                                                                                                                                                                                                                                                                 | 445.0727[M-H] <sup>-</sup> ,<br>269.0439[M-H-C <sub>6</sub> H <sub>8</sub> O <sub>6</sub> ] <sup>-</sup> ,                                                                                                                                             | Baicalin <sup>a</sup>                     | Flavonoids              | HQ, GC |           |
| 63  | C <sub>21</sub> H <sub>22</sub> O <sub>9</sub>  | 19.28   | 419.1324<br>(-3.1)                 | 417.1166<br>(-5.9)                 | 419.1321[M+H] <sup>+</sup> ,<br>257.0797[M+H-Glc] <sup>+</sup> ,<br>137.0224                                                                                                                                                                                                                                                                                                               | 417.1147[M-H] <sup>-</sup> ,<br>297.0711[M-H-C <sub>4</sub> H <sub>8</sub> O <sub>4</sub> ] <sup>-</sup> ,<br>255.0650[M-H-Glc] <sup>-</sup> ,<br>148.0163,<br>135.0082                                                                                | Isoliquiritin <sup>a</sup>                | Flavonoids              | GC     |           |
| 64  | C <sub>42</sub> H <sub>68</sub> O <sub>14</sub> | 19.47   | ND                                 | 795.4515<br>(-2.7)                 | ND                                                                                                                                                                                                                                                                                                                                                                                         | 841.4527[M+COOH] <sup>-</sup> ,<br>795.4515[M-H] <sup>-</sup> ,<br>633.4030[M-H-Glc] <sup>-</sup> ,                                                                                                                                                    | 21β-Hydroxysaikosaponin <sup>b2</sup>     | Triterpenoid<br>saponin | CH     | [20]      |
| 65  | C <sub>21</sub> H <sub>22</sub> O <sub>9</sub>  | 19.69   | 419.1322<br>(-3.5)                 | 417.1159<br>(-7.7)                 | 419.1338[M+H] <sup>+</sup> ,<br>257.0800[M+H-Glc] <sup>+</sup> ,<br>147.0424,<br>137.0234                                                                                                                                                                                                                                                                                                  | 417.1153[M-H] <sup>-</sup> ,<br>255.0656[M-H-Glc] <sup>-</sup> ,<br>135.0089, 119.0498                                                                                                                                                                 | Neoisoliquiritin                          | Flavonoids              | GC     | [11]      |

| No. | formula                                         | tr, min | [M+H] <sup>+</sup><br>(error, ppm) | [M-H] <sup>-</sup><br>(error, ppm) | Major fragment ions in<br>positive mode (m, z) <sup>b</sup>                                                                                                                                         | Major fragment ions in<br>negative mode (m, z) <sup>b</sup>                                                                                                                                                                                                                       | identification                                                            | Structure<br>type | Source | Reference |
|-----|-------------------------------------------------|---------|------------------------------------|------------------------------------|-----------------------------------------------------------------------------------------------------------------------------------------------------------------------------------------------------|-----------------------------------------------------------------------------------------------------------------------------------------------------------------------------------------------------------------------------------------------------------------------------------|---------------------------------------------------------------------------|-------------------|--------|-----------|
| 66  | C <sub>35</sub> H <sub>36</sub> O <sub>15</sub> | 19.77   | 697.2121<br>(-0.9)                 | 695.1939<br>(-2.9)                 | 697.1801<br>257.0770[M+H-C <sub>20</sub> H <sub>25</sub> O <sub>11</sub> ] <sup>-</sup><br>167.0331                                                                                                 | 695.1927<br>549.1573[M-H-C <sub>9</sub> H <sub>7</sub> O <sub>2</sub> ] <sup>-</sup><br>255.0639[M-H-C <sub>20</sub> H <sub>25</sub> O <sub>11</sub> ] <sup>-</sup>                                                                                                               | Licorice glycoside B                                                      | Flavonoids        | GC     | [6]       |
| 67  | C <sub>15</sub> H <sub>10</sub> O <sub>4</sub>  | 20.24   | 255.0646 (-<br>2.3)                | 253.0498<br>(-3.4)                 | 255.0642[M+H] <sup>+</sup><br>137.0227[M+H-C <sub>8</sub> H <sub>6</sub> O] <sup>+</sup>                                                                                                            | 253.0495[M-H] <sup>-</sup><br>135.0083[M-H-C <sub>8</sub> H <sub>6</sub> O] <sup>-</sup><br>117.0345[M-H-C <sub>7</sub> H <sub>4</sub> O <sub>3</sub> ] <sup>-</sup>                                                                                                              | 4',7-Dihydroxyflavone                                                     | Flavonoids        | GC     | [21]      |
| 68  | C <sub>15</sub> H <sub>12</sub> O <sub>5</sub>  | 20.25   | 273.0747 (-<br>2.4)                | ND                                 | 273.0745[M+H] <sup>+</sup><br>169.0115[M+H-C <sub>8</sub> H <sub>8</sub> ] <sup>+</sup><br>131.0472[M+H-C <sub>6</sub> H <sub>4</sub> O <sub>4</sub> ] <sup>+</sup>                                 | ND                                                                                                                                                                                                                                                                                | Dihydrobaicalein                                                          | Flavonoids        | HQ     | [22]      |
| 69  | C <sub>21</sub> H <sub>20</sub> O <sub>11</sub> | 20.26   | 449.1057<br>(-4.7)                 | 447.0898<br>(-7.9)                 | 273.0748[M+H-C <sub>6</sub> H <sub>8</sub> O <sub>6</sub> ] <sup>+</sup><br>169.0124                                                                                                                | 447.0891[M-H] <sup>-</sup><br>271.0597[M-H-C <sub>6</sub> H <sub>8</sub> O <sub>6</sub> ] <sup>-</sup>                                                                                                                                                                            | Naringenin-7-O-Glu<br>acid                                                | Flavonoids        | HQ     | [23]      |
| 70  | C <sub>31</sub> H <sub>40</sub> O <sub>15</sub> | 20.4    | ND                                 | 651.2254<br>(-6.2)                 | ND                                                                                                                                                                                                  | 651.2247[M-H] <sup>-</sup><br>475.1895[M-H-C <sub>6</sub> H <sub>8</sub> O <sub>6</sub> ] <sup>-</sup><br>175.0422                                                                                                                                                                | Epimeredinoside A <sup>c</sup>                                            | Glycosides        | HQ     |           |
| 71  | C <sub>21</sub> H <sub>20</sub> O <sub>11</sub> | 20.62   | 449.1043<br>(-5.0)                 | 447.0898<br>(-7.1)                 | 449.0977[M+H] <sup>+</sup><br>273.0736[M+H-C <sub>6</sub> H <sub>8</sub> O <sub>6</sub> -C <sub>8</sub> H <sub>8</sub> ] <sup>+</sup><br>169.0121                                                   | 447.0895[M-H] <sup>-</sup><br>271.0606[M-H-C <sub>6</sub> H <sub>8</sub> O <sub>6</sub> ] <sup>-</sup><br>243.0661[M-H-C <sub>6</sub> H <sub>8</sub> O <sub>6</sub> -CO] <sup>-</sup>                                                                                             | 5,6,7-Trihydroxy<br>flavanone<br>(Dihydroxybaicalein)-<br>7-O-glucuronide | Flavonoids        | HQ     | [5,24]    |
| 72  | C <sub>21</sub> H <sub>18</sub> O <sub>11</sub> | 20.75   | 447.0905<br>(-3.2)                 | 445.0745<br>(-6.3)                 | 447.0912[M+H] <sup>+</sup><br>271.0597[M+H-C <sub>6</sub> H <sub>8</sub> O <sub>6</sub> ] <sup>+</sup>                                                                                              | 445.0738[M-H] <sup>-</sup><br>269.0444[M-H-C <sub>6</sub> H <sub>8</sub> O <sub>6</sub> ] <sup>-</sup>                                                                                                                                                                            | Baicalein 6-O-<br>glucuronide                                             | Flavonoids        | HQ     | [23]      |
| 73  | C <sub>22</sub> H <sub>20</sub> O <sub>12</sub> | 20.92   | 477.1007<br>(-4.2)                 | 475.0846<br>(-4.9)                 | 477.1019[M+H] <sup>+</sup><br>301.0696[M+H-C <sub>6</sub> H <sub>8</sub> O <sub>6</sub> ] <sup>+</sup><br>286.0462[M+H-C <sub>6</sub> H <sub>8</sub> O <sub>6</sub> -CH <sub>3</sub> ] <sup>+</sup> | 475.0858[M-H] <sup>-</sup><br>299.0560[M-H-C <sub>6</sub> H <sub>8</sub> O <sub>6</sub> ] <sup>-</sup><br>284.0311[M-H-C <sub>6</sub> H <sub>8</sub> O <sub>6</sub> -CH <sub>3</sub> ] <sup>-</sup><br>175.0241[M-H-C <sub>16</sub> H <sub>12</sub> O <sub>6</sub> ] <sup>-</sup> | 5,7,8-Trihydroxy-6-<br>methoxyflavone-7-O-<br>glucuronide                 | Flavonoids        | HQ     | [5,16]    |

| No. | formula                                         | tr, min | [M+H] <sup>+</sup><br>(error, ppm) | [M-H] <sup>-</sup><br>(error, ppm) | Major fragment ions in<br>positive mode (m, z) <sup>b</sup>                                                                                                                                               | Major fragment ions in<br>negative mode (m, z) <sup>b</sup>                                                                                                                                                                                                                                                                                                                                | identification                                            | Structure<br>type       | Source | Reference |
|-----|-------------------------------------------------|---------|------------------------------------|------------------------------------|-----------------------------------------------------------------------------------------------------------------------------------------------------------------------------------------------------------|--------------------------------------------------------------------------------------------------------------------------------------------------------------------------------------------------------------------------------------------------------------------------------------------------------------------------------------------------------------------------------------------|-----------------------------------------------------------|-------------------------|--------|-----------|
| 74  | C <sub>22</sub> H <sub>22</sub> O <sub>10</sub> | 21.06   | 447.0904<br>(-3)                   | ND                                 | 447.0913[M+H] <sup>+</sup> ,<br>285.0745[M+H-Glc] <sup>+</sup> ,<br>271.0596[M+H-C <sub>6</sub> H <sub>8</sub> O <sub>6</sub> ] <sup>+</sup> ,                                                            | ND                                                                                                                                                                                                                                                                                                                                                                                         | Wogonin 7-glucoside                                       | Flavonoids              | HQ     | [5,24]    |
| 75  | C <sub>31</sub> H <sub>40</sub> O <sub>15</sub> | 21.2    | ND                                 | 651.2257<br>(-5.8)                 | ND                                                                                                                                                                                                        | 651.2244[M-H] <sup>-</sup> ,<br>351.0559[M-H-C <sub>9</sub> H <sub>11</sub> O <sub>2</sub> -<br>C <sub>9</sub> H <sub>9</sub> O <sub>2</sub> ] <sup>-</sup> ,<br>175.0394[M-H-C <sub>9</sub> H <sub>11</sub> O <sub>2</sub> -<br>C <sub>12</sub> H <sub>20</sub> O <sub>10</sub> ] <sup>-</sup>                                                                                            | Isomartynoside                                            | Glycosides              | HQ     | [5]       |
| 76  | C <sub>15</sub> H <sub>12</sub> O <sub>4</sub>  | 21.31   | 257.0808<br>(-0.2)                 | 255.0656<br>(-2.8)                 | 257.0801[M+H] <sup>+</sup> ,<br>147.0425[M+H-C <sub>6</sub> H <sub>5</sub> O <sub>2</sub> ] <sup>+</sup> ,<br>137.0218[M+H-C <sub>8</sub> H <sub>7</sub> O] <sup>+</sup> ,                                | 255.0669[M-H] <sup>-</sup> ,<br>219.8440[M-H-2H <sub>2</sub> O] <sup>-</sup> ,<br>201.8325[M-H-3H <sub>2</sub> O] <sup>-</sup> ,<br>135.0082[M-H-C <sub>8</sub> H <sub>7</sub> O] <sup>-</sup> ,<br>119.0498[M-H-C <sub>7</sub> H <sub>5</sub> O <sub>3</sub> ] <sup>-</sup> ,<br>91.0199[M-H-C <sub>7</sub> H <sub>5</sub> O <sub>3</sub> -C <sub>2</sub> H <sub>4</sub> ] <sup>-</sup> , | Liquiritigenin <sup>a, c</sup>                            | Flavonoids              | GC     | [15]      |
| 77  | C <sub>22</sub> H <sub>20</sub> O <sub>11</sub> | 21.37   | 461.1064<br>(-3.2)                 | 459.0904<br>(-6.3)                 | 461.1058[M+H] <sup>+</sup> ,<br>285.0745[M+H-C <sub>6</sub> H <sub>8</sub> O <sub>6</sub> ] <sup>+</sup> ,<br>270.0518[M+H-C <sub>6</sub> H <sub>8</sub> O <sub>6</sub> -CH <sub>3</sub> ] <sup>+</sup> , | 459.0884[M-H] <sup>-</sup> ,<br>283.0599[M-H-C <sub>6</sub> H <sub>8</sub> O <sub>6</sub> ] <sup>-</sup> ,<br>268.0369[M-H-C <sub>6</sub> H <sub>8</sub> O <sub>6</sub> -CH <sub>3</sub> ] <sup>-</sup> ,<br>175.0240, 113.0234                                                                                                                                                            | Oroxyloside (Oroxylin<br>A-7-O-glucuronide)               | Flavonoids              | HQ     | [23]      |
| 78  | C <sub>42</sub> H <sub>64</sub> O <sub>16</sub> | 21.42   | 825.4241<br>(-0.2)                 | 823.4093<br>(-3.5)                 | 825.4147<br>649.3935<br>455.3506[M+H-C <sub>12</sub> H <sub>16</sub> O <sub>13</sub> ] <sup>+</sup> ,                                                                                                     | 823.4092                                                                                                                                                                                                                                                                                                                                                                                   | Licorice saponin J2                                       | Triterpenoid<br>saponin | GC     | [5]       |
| 79  | C <sub>22</sub> H <sub>20</sub> O <sub>12</sub> | 21.64   | 477.1010<br>(-3.7)                 | 475.0848<br>(-6.4)                 | 477.1020[M+H] <sup>+</sup> ,<br>301.0701[M+H-C <sub>6</sub> H <sub>8</sub> O <sub>6</sub> ] <sup>+</sup> ,<br>286.0472[M+H-C <sub>6</sub> H <sub>8</sub> O <sub>6</sub> -CH <sub>3</sub> ]                | 475.0853[M-H] <sup>-</sup> ,<br>299.0554[M-H-C <sub>6</sub> H <sub>8</sub> O <sub>6</sub> ] <sup>-</sup> ,<br>284.0313[M-H-C <sub>6</sub> H <sub>8</sub> O <sub>6</sub> -CH <sub>3</sub> ] <sup>-</sup> ,                                                                                                                                                                                  | 5,6,7-Trihydroxy-8-<br>methoxyflavone-7-O-<br>glucuronide | Flavonoids              | HQ     | [6]       |

| No. | formula                                         | tr, min | [M+H] <sup>+</sup><br>(error, ppm) | [M-H] <sup>-</sup><br>(error, ppm) | Major fragment ions in<br>positive mode (m, z) <sup>b</sup>                                                                                                                                                                                                                                                                                                                                                                                                                                                                | Major fragment ions in<br>negative mode (m, z) <sup>b</sup>                                                                                                                                                                       | identification           | Structure<br>type       | Source | Reference |
|-----|-------------------------------------------------|---------|------------------------------------|------------------------------------|----------------------------------------------------------------------------------------------------------------------------------------------------------------------------------------------------------------------------------------------------------------------------------------------------------------------------------------------------------------------------------------------------------------------------------------------------------------------------------------------------------------------------|-----------------------------------------------------------------------------------------------------------------------------------------------------------------------------------------------------------------------------------|--------------------------|-------------------------|--------|-----------|
| 80  | C <sub>42</sub> H <sub>70</sub> O <sub>14</sub> | 21.94   | 799.4790<br>(-6)                   | 797.4646<br>(-2.9)                 | ND                                                                                                                                                                                                                                                                                                                                                                                                                                                                                                                         | 843.4675[M+COOH] <sup>-</sup> ,<br>797.4646[M-H] <sup>-</sup> ,<br>635.4054[M-H-Glc] <sup>-</sup>                                                                                                                                 | Hydroxysaikosaponin<br>A | Triterpenoid<br>saponin | CH     | [5,24]    |
| 81  | C <sub>16</sub> H <sub>12</sub> O <sub>5</sub>  | 22.31   | 285.0746<br>(-2.6)                 | 283.0589<br>(-1)                   | 285.0750[M+H] <sup>+</sup> ,<br>270.0512[M+H-CH <sub>3</sub> ] <sup>+</sup> ,                                                                                                                                                                                                                                                                                                                                                                                                                                              | 283.0587[M-H] <sup>-</sup> ,<br>268.0364[M-H-CH <sub>3</sub> ] <sup>-</sup> ,<br>163.0043[M-H-CH <sub>3</sub> -C <sub>7</sub> H <sub>5</sub> O] <sup>-</sup> ,                                                                    | Isomer of wogonin        | Flavonoids              | HQ     | [20]      |
| 82  | C <sub>22</sub> H <sub>20</sub> O <sub>11</sub> | 22.32   | 461.1062<br>(-3.1)                 | 459.0900<br>(-6.2)                 | 461.1048[M+H] <sup>+</sup> ,<br>285.0744[M+H-C <sub>6</sub> H <sub>8</sub> O <sub>6</sub> ] <sup>+</sup> ,<br>270.0514[M+H-C <sub>6</sub> H <sub>8</sub> O <sub>6</sub> -CH <sub>3</sub> ] <sup>+</sup> ,                                                                                                                                                                                                                                                                                                                  | 459.0900[M-H] <sup>-</sup> ,<br>283.0598[M-H-C <sub>6</sub> H <sub>8</sub> O <sub>6</sub> ] <sup>-</sup> ,<br>268.0363[M-H-C <sub>6</sub> H <sub>8</sub> O <sub>6</sub> -CH <sub>3</sub> ] <sup>-</sup> ,<br>175.0249<br>113.0241 | Wogonoside <sup>a</sup>  | Flavonoids              | HQ     |           |
| 83  | C <sub>15</sub> H <sub>10</sub> O <sub>7</sub>  | 22.4    | 303.0502<br>(0.8)                  | 301.0354<br>(0)                    | ND                                                                                                                                                                                                                                                                                                                                                                                                                                                                                                                         | 301.0299[M-H] <sup>-</sup> ,<br>178.9955[M-H-C <sub>6</sub> H <sub>4</sub> O <sub>3</sub> ] <sup>-</sup> ,<br>151.0064[M-H-C <sub>8</sub> H <sub>6</sub> O <sub>3</sub> ] <sup>-</sup> ,                                          | Quercetin <sup>a</sup>   | Flavonoids              | CH     |           |
| 84  | C <sub>48</sub> H <sub>72</sub> O <sub>21</sub> | 22.69   | 985.4640<br>(0.1)                  | 983.4446<br>(-4.4)                 | 985.4612<br>809.4258[M+H-C <sub>6</sub> H <sub>8</sub> O <sub>6</sub> ] <sup>+</sup> ,<br>647.3756[M+H-C <sub>6</sub> H <sub>8</sub> O <sub>6</sub> -C <sub>6</sub> H <sub>10</sub> O <sub>5</sub> ] <sup>+</sup> ,<br>615.3866[M+H-C <sub>6</sub> H <sub>8</sub> O <sub>6</sub> -C <sub>6</sub> H <sub>8</sub> O <sub>7</sub> ] <sup>+</sup><br>453.3352[M+H-C <sub>6</sub> H <sub>8</sub> O <sub>6</sub> -C <sub>6</sub> H <sub>10</sub> O <sub>5</sub> -<br>C <sub>6</sub> H <sub>8</sub> O <sub>7</sub> ] <sup>+</sup> | 983.4468                                                                                                                                                                                                                          | Licorice saponin A3      | Triterpenoid<br>saponin | GC     | [6]       |
| 85  | C <sub>42</sub> H <sub>62</sub> O <sub>17</sub> | 24.21   | 839.4021<br>(-4.6)                 | 837.3871<br>(-4.7)                 | 839.4033[M+H] <sup>+</sup> ,<br>663.3747[M+H-Glc] <sup>+</sup> ,<br>469.3297[M+H-2Glc-H <sub>2</sub> O] <sup>+</sup> ,                                                                                                                                                                                                                                                                                                                                                                                                     | 837.3855[M-H] <sup>-</sup> ,                                                                                                                                                                                                      | Uralsaponin N            | Triterpenoid<br>saponin | GC     | [6]       |

| No. | formula                                         | tr, min | [M+H] <sup>+</sup><br>(error, ppm) | [M-H] <sup>-</sup><br>(error, ppm) | Major fragment ions in<br>positive mode (m, z) <sup>b</sup>                                                                                                                                                                                                                                                                                                                                                                   | Major fragment ions in<br>negative mode (m, z) <sup>b</sup>                                                                                                  | identification                        | Structure<br>type       | Source | Reference |
|-----|-------------------------------------------------|---------|------------------------------------|------------------------------------|-------------------------------------------------------------------------------------------------------------------------------------------------------------------------------------------------------------------------------------------------------------------------------------------------------------------------------------------------------------------------------------------------------------------------------|--------------------------------------------------------------------------------------------------------------------------------------------------------------|---------------------------------------|-------------------------|--------|-----------|
| 86  | C <sub>16</sub> H <sub>12</sub> O <sub>6</sub>  | 24.71   | 301.0699<br>(-0.4)                 | 299.0547<br>(-4.6)                 | 301.0713<br>286.0472[M+H-CH <sub>3</sub> ] <sup>+</sup> ,<br>168.0128[M+H-CH <sub>3</sub> -C <sub>8</sub> H <sub>6</sub> O] <sup>+</sup>                                                                                                                                                                                                                                                                                      | 299.0550<br>284.0303[M-H-CH <sub>3</sub> ] <sup>-</sup> ,<br>136.9875                                                                                        | Trihydroxy-<br>methoxyfavone          | Flavonoids              | HQ     | [12]      |
| 87  | C <sub>15</sub> H <sub>10</sub> O <sub>5</sub>  | 25.54   | 271.0594<br>(-2.5)                 | 269.0444<br>(-3)                   | 271.0599[M+H] <sup>+</sup> ,<br>169.0133[M+H-C <sub>8</sub> H <sub>6</sub> ] <sup>+</sup>                                                                                                                                                                                                                                                                                                                                     | 269.0446[M-H] <sup>-</sup> ,<br>225.0537[M-H-CO <sub>2</sub> ] <sup>-</sup> ,<br>197.0606[M-H-CO <sub>2</sub> -CO] <sup>-</sup> ,<br>171.0433                | Norwogonin                            | Flavonoids              | HQ     | [5,15]    |
| 88  | C <sub>48</sub> H <sub>78</sub> O <sub>17</sub> | 25.61   | 927.5252<br>(-1.7)                 | 925.5058<br>(-3.2)                 | 927.5343[M+H] <sup>+</sup> ,<br>747.4375[M+H-C <sub>6</sub> H <sub>11</sub> O <sub>6</sub> ] <sup>+</sup> ,<br>603.4330[M+H-C <sub>6</sub> H <sub>11</sub> O <sub>5</sub> -C <sub>6</sub> H <sub>11</sub> O <sub>4</sub> -<br>CH <sub>3</sub> ] <sup>+</sup> ,<br>421.3416[M+H-2C <sub>6</sub> H <sub>11</sub> O <sub>5</sub> -C <sub>6</sub> H <sub>9</sub> O <sub>5</sub> -<br>H <sub>2</sub> O] <sup>+</sup> ,<br>309.1190 | 971.5080[M+COOH] <sup>-</sup> ,<br>925.5058[M-H] <sup>-</sup>                                                                                                | Saikosaponin c <sup>a</sup>           | Triterpenoid<br>saponin | CH     | [5]       |
| 89  | C <sub>16</sub> H <sub>12</sub> O <sub>6</sub>  | 25.7    | 301.0699<br>(-2.6)                 | 299.0544<br>(-4.8)                 | 301.0698[M+H] <sup>+</sup> ,<br>286.0459[M+H-CH <sub>3</sub> ] <sup>+</sup> ,<br>183.9985[M+H-CH <sub>3</sub> -C <sub>8</sub> H <sub>6</sub> ] <sup>+</sup> ,                                                                                                                                                                                                                                                                 | 299.0547[M-H] <sup>-</sup> ,<br>284.0312[M-H-CH <sub>3</sub> ] <sup>-</sup> ,<br>153.9900[M-H-CH <sub>3</sub> -C <sub>9</sub> H <sub>6</sub> O] <sup>-</sup> | 5,7,8-Trihydroxy-6-<br>methoxyflavone | Flavonoids              | HQ     | [25]      |
| 90  | C <sub>15</sub> H <sub>10</sub> O <sub>5</sub>  | 26.17   | 271.0595<br>(-2.2)                 | 269.0442<br>(-3.6)                 | 271.0592[M+H] <sup>+</sup><br>123.0068[M+H-H <sub>2</sub> O-C <sub>9</sub> H <sub>6</sub> O] <sup>+</sup> ,                                                                                                                                                                                                                                                                                                                   | 269.0435[M-H] <sup>-</sup> ,<br>169.0656[M-H-C <sub>8</sub> H <sub>6</sub> ] <sup>-</sup> ,                                                                  | Baicalein <sup>a</sup>                | Flavonoids              | HQ     | [26]      |
| 91  | C <sub>42</sub> H <sub>62</sub> O <sub>17</sub> | 26.2    | 839.4060<br>(0.1)                  | 837.3867<br>(-5.1)                 | 839.3984[M+H] <sup>+</sup> ,<br>663.3678[M+H-Glc] <sup>+</sup> ,<br>487.3388[M+H-2Glc] <sup>+</sup> ,<br>469.3286[M+H-2Glc-H <sub>2</sub> O] <sup>+</sup> ,                                                                                                                                                                                                                                                                   | 837.3866[M-H] <sup>-</sup> ,                                                                                                                                 | Yunganoside K2                        | Triterpenoid<br>saponin | GC     | [6]       |
| 92  | C <sub>48</sub> H <sub>80</sub> O <sub>17</sub> | 26.44   | 929.5457<br>(-1.2)                 | 927.5261<br>(-4.2)                 | 929.5431<br>767.4906[M+H-Glc] <sup>+</sup> ,                                                                                                                                                                                                                                                                                                                                                                                  | 973.5311[M+COOH] <sup>-</sup><br>927.5261[M-H] <sup>-</sup>                                                                                                  | Saikosaponin f                        | Triterpenoid<br>saponin | CH     | [6]       |

| No. | formula                                         | tr, min | [M+H] <sup>+</sup><br>(error, ppm) | [M-H] <sup>-</sup><br>(error, ppm) | Major fragment ions in<br>positive mode (m, z) <sup>b</sup>                                                                                                                                                                                                                                                                                                                   | Major fragment ions in<br>negative mode (m, z) <sup>b</sup>                                                                                                                                                                                                                                                                                                                                | identification                    | Structure<br>type       | Source | Reference |
|-----|-------------------------------------------------|---------|------------------------------------|------------------------------------|-------------------------------------------------------------------------------------------------------------------------------------------------------------------------------------------------------------------------------------------------------------------------------------------------------------------------------------------------------------------------------|--------------------------------------------------------------------------------------------------------------------------------------------------------------------------------------------------------------------------------------------------------------------------------------------------------------------------------------------------------------------------------------------|-----------------------------------|-------------------------|--------|-----------|
|     |                                                 |         |                                    |                                    | 471.1678[M+H-Glc-C <sub>6</sub> H <sub>11</sub> O <sub>4</sub> -<br>C <sub>5</sub> H <sub>8</sub> O <sub>5</sub> ] <sup>+</sup> ,<br>441.3737[M+H-2C <sub>6</sub> H <sub>9</sub> O <sub>6</sub> -<br>C <sub>6</sub> H <sub>11</sub> O <sub>4</sub> ] <sup>+</sup> ,<br>423.3608[M+H-2Glc-C <sub>6</sub> H <sub>11</sub> O <sub>4</sub> -<br>2H <sub>2</sub> O] <sup>+</sup> , |                                                                                                                                                                                                                                                                                                                                                                                            |                                   |                         |        |           |
| 93  | C <sub>42</sub> H <sub>62</sub> O <sub>17</sub> | 26.99   | 837.3871<br>(-2.7)                 | 837.3871<br>(-5.2)                 | 839.4016[M+H] <sup>+</sup> ,<br>663.3718[M+H-Glc] <sup>+</sup> ,<br>487.3405[M+H-2Glc] <sup>+</sup> ,<br>469.3302[M+H-2Glc-H <sub>2</sub> O] <sup>+</sup> ,                                                                                                                                                                                                                   | 837.3869[M-H] <sup>-</sup> ,                                                                                                                                                                                                                                                                                                                                                               | Licorice saponin G                | Triterpenoid<br>saponin | GC     | [25]      |
| 94  | C <sub>16</sub> H <sub>12</sub> O <sub>6</sub>  | 27.07   | 301.0709<br>(0.9)                  | 299.0551<br>(-3.5)                 | 301.0702<br>286.0478[M+H-CH <sub>3</sub> ] <sup>+</sup> ,<br>168.0050                                                                                                                                                                                                                                                                                                         | 299.0534<br>284.0319[M-H-CH <sub>3</sub> ] <sup>-</sup> ,<br>137.9952                                                                                                                                                                                                                                                                                                                      | Hispidulin                        | Flavonoids              | HQ     | [6,12]    |
| 95  | C <sub>42</sub> H <sub>62</sub> O <sub>17</sub> | 27.37   | 839.4023<br>(-4.3)                 | 837.3874<br>(-4.6)                 | 839.4030[M+H] <sup>+</sup> ,<br>645.3597[M+H-Glc-H <sub>2</sub> O] <sup>+</sup> ,<br>487.3383[M+H-2Glc] <sup>+</sup> ,<br>469.3294[M+H-2Glc-H <sub>2</sub> O] <sup>+</sup> ,                                                                                                                                                                                                  | 837.3872[M-H] <sup>-</sup> ,                                                                                                                                                                                                                                                                                                                                                               | Licorice saponin G2               | Triterpenoid<br>saponin | GC     | [27]      |
| 96  | C <sub>15</sub> H <sub>12</sub> O <sub>4</sub>  | 27.6    | 257.0805<br>(-1.3)                 | 255.0655<br>(-2.9)                 | 257.0806[M+H] <sup>+</sup> ,<br>147.0424[M+H-C <sub>6</sub> H <sub>5</sub> O <sub>2</sub> ] <sup>+</sup> ,<br>137.0219[M+H-C <sub>8</sub> H <sub>7</sub> O] <sup>+</sup> ,                                                                                                                                                                                                    | 255.0659[M-H] <sup>-</sup> ,<br>219.8439[M-H-2H <sub>2</sub> O] <sup>-</sup> ,<br>201.8345[M-H-3H <sub>2</sub> O] <sup>-</sup> ,<br>135.0078[M-H-C <sub>8</sub> H <sub>7</sub> O] <sup>-</sup> ,<br>119.0497[M-H-C <sub>7</sub> H <sub>5</sub> O <sub>3</sub> ] <sup>-</sup> ,<br>91.0179[M-H-C <sub>7</sub> H <sub>5</sub> O <sub>3</sub> -C <sub>2</sub> H <sub>4</sub> ] <sup>-</sup> , | Isoliquiritigenin <sup>a, c</sup> | Flavonoids              | GC     | [6]       |
| 97  | C <sub>42</sub> H <sub>62</sub> O <sub>16</sub> | 27.74   | 823.4069<br>(-4.8)                 | 821.3922<br>(-5.3)                 | 823.4046[M+H] <sup>+</sup> ,<br>647.3737[M+H-C <sub>6</sub> H <sub>9</sub> O <sub>6</sub> ] <sup>+</sup> ,<br>453.3321[M+H-C <sub>6</sub> H <sub>9</sub> O <sub>6</sub> -C <sub>6</sub> H <sub>8</sub> O <sub>7</sub> ] <sup>+</sup> ,                                                                                                                                        | 821.3885[M-H] <sup>-</sup> ,                                                                                                                                                                                                                                                                                                                                                               | Glycyrrhizic acid <sup>a</sup>    | Triterpenoid<br>saponin | GC     |           |



| No. | formula                                         | tr, min | [M+H] <sup>+</sup><br>(error, ppm) | [M-H] <sup>-</sup><br>(error, ppm) | Major fragment ions in<br>positive mode (m, z) <sup>b</sup>                                                                                                                                                                                                                                                                                                         | Major fragment ions in<br>negative mode (m, z) <sup>b</sup>                   | identification                           | Structure<br>type       | Source | Reference |
|-----|-------------------------------------------------|---------|------------------------------------|------------------------------------|---------------------------------------------------------------------------------------------------------------------------------------------------------------------------------------------------------------------------------------------------------------------------------------------------------------------------------------------------------------------|-------------------------------------------------------------------------------|------------------------------------------|-------------------------|--------|-----------|
| 98  | C <sub>16</sub> H <sub>12</sub> O <sub>4</sub>  | 27.88   | 269.0807<br>(-0.5)                 | 267.0649<br>(0.8)                  | 269.0802[M+H] <sup>+</sup> ,                                                                                                                                                                                                                                                                                                                                        | 267.0647[M-H] <sup>-</sup> ,<br>252.0428[M-H-CH <sub>3</sub> ] <sup>-</sup> , | Formononetin <sup>a,c</sup>              | Flavonoids              | GC     |           |
| 99  | C <sub>42</sub> H <sub>68</sub> O <sub>13</sub> | 28.74   | 781.4694<br>(-5.0)                 | 779.4536<br>(-6.5)                 | 781.4638[M+H] <sup>+</sup> ,<br>745.4519[M+H-2H <sub>2</sub> O] <sup>+</sup> ,<br>619.4267[M+H-Glc] <sup>+</sup> ,<br>455.3498[M+H-Glc-H <sub>2</sub> O-Fuc] <sup>+</sup> ,<br>437.3397[M+H-Glc-2H <sub>2</sub> O-Fuc] <sup>+</sup> ,<br>419.3331[M+H-Glc-3H <sub>2</sub> O-Fuc] <sup>+</sup> ,                                                                     | 779.4585[M-H] <sup>-</sup> ,<br>617.4278[M-H-Glc] <sup>-</sup> ,              | Saikosaponin a <sup>a</sup>              | Triterpenoid<br>saponin | CH     |           |
| 100 | C <sub>42</sub> H <sub>64</sub> O <sub>15</sub> | 28.77   | 809.4039<br>(-1.2)                 | 807.4125<br>(-5)                   | 809.4331<br>633.3988[M+H-C <sub>6</sub> H <sub>9</sub> O <sub>6</sub> ] <sup>+</sup> ,<br>457.3668[M+H-C <sub>6</sub> H <sub>9</sub> O <sub>6</sub> -C <sub>6</sub> H <sub>8</sub> O <sub>6</sub> ] <sup>+</sup> ,<br>439.3576[M+H-C <sub>6</sub> H <sub>9</sub> O <sub>6</sub> -C <sub>6</sub> H <sub>8</sub> O <sub>6</sub> -<br>H <sub>2</sub> O] <sup>+</sup> , | 807.4097<br>351.0550                                                          | Licorice saponin B2                      | Triterpenoid<br>saponin | GC     | [6]       |
| 101 | C <sub>30</sub> H <sub>46</sub> O <sub>3</sub>  | 28.99   | 455.3501<br>(-4.1)                 | ND                                 | 455.3469[M+H] <sup>+</sup> ,<br>437.3337[M+H-H <sub>2</sub> O] <sup>+</sup> ,<br>419.3270[M+H-2H <sub>2</sub> O] <sup>+</sup> ,<br>407.3309[M+H-H <sub>2</sub> O-2CH <sub>3</sub> ] <sup>+</sup> ,                                                                                                                                                                  | ND                                                                            | Betulonicacid <sup>c</sup>               | Terpenoids              | CH, DZ | [6,28,29] |
| 102 | C <sub>42</sub> H <sub>68</sub> O <sub>13</sub> | 29.01   | 781.4689<br>(-5.6)                 | 779.4550<br>(-4.7)                 | 763.4559[M+H-H <sub>2</sub> O] <sup>+</sup> ,<br>619.4174[M+H-Glc] <sup>+</sup> ,<br>455.3496[M+H-Glc-H <sub>2</sub> O-Fuc] <sup>+</sup> ,<br>437.3399[M+H-Glc-2H <sub>2</sub> O-Fuc] <sup>+</sup> ,<br>419.3257[M+H-Glc-3H <sub>2</sub> O-Fuc] <sup>+</sup> ,                                                                                                      | 779.4516[M-H] <sup>-</sup> ,<br>617.4070[M-H-Glc] <sup>-</sup> ,              | Saikosaponin b <sub>2</sub> <sup>a</sup> | Triterpenoid<br>saponin | CH     | [28,29]   |
| 103 | C <sub>42</sub> H <sub>62</sub> O <sub>16</sub> | 29.06   | 823.4065<br>(-5.2)                 | 821.3917<br>(-5.7)                 | 823.4081[M+H] <sup>+</sup> ,<br>647.3743[M+H-C <sub>6</sub> H <sub>9</sub> O <sub>6</sub> ] <sup>+</sup> ,<br>453.3335[M+H-C <sub>6</sub> H <sub>9</sub> O <sub>6</sub> -C <sub>6</sub> H <sub>8</sub> O <sub>7</sub> ] <sup>+</sup> ,                                                                                                                              | 821.3874[M-H] <sup>-</sup> ,                                                  | Uralsaponin B                            | Triterpenoid<br>saponin | GC     | [6]       |

| No. | formula                                         | tr, min | [M+H] <sup>+</sup><br>(error, ppm) | [M-H] <sup>-</sup><br>(error, ppm) | Major fragment ions in<br>positive mode (m, z) <sup>b</sup>                                                                                                                                                                                                                                                                                                                                                                                                                                                                                                                                                      | Major fragment ions in<br>negative mode (m, z) <sup>b</sup>                                                                                                                                                                                                                        | identification                           | Structure<br>type       | Source | Reference |
|-----|-------------------------------------------------|---------|------------------------------------|------------------------------------|------------------------------------------------------------------------------------------------------------------------------------------------------------------------------------------------------------------------------------------------------------------------------------------------------------------------------------------------------------------------------------------------------------------------------------------------------------------------------------------------------------------------------------------------------------------------------------------------------------------|------------------------------------------------------------------------------------------------------------------------------------------------------------------------------------------------------------------------------------------------------------------------------------|------------------------------------------|-------------------------|--------|-----------|
| 104 | C <sub>21</sub> H <sub>20</sub> O <sub>6</sub>  | 29.41   | 369.1323<br>(-2.6)                 | 367.1162<br>(-6.8)                 | 369.1289[M+H] <sup>+</sup> ,<br>313.0713[M+H-C <sub>3</sub> H <sub>4</sub> O] <sup>+</sup> ,<br>271.0602[M+H-2CH <sub>2</sub> O-2H <sub>2</sub> O] <sup>+</sup>                                                                                                                                                                                                                                                                                                                                                                                                                                                  | 367.1171[M-H] <sup>-</sup> ,<br>309.0395[M-H-2CH <sub>2</sub> O] <sup>-</sup>                                                                                                                                                                                                      | Curcumin <sup>c</sup>                    | Phenolic<br>acids       | SJ     | [6]       |
| 105 | C <sub>48</sub> H <sub>76</sub> O <sub>19</sub> | 29.48   | 957.5049<br>(-0.5)                 | 955.4845<br>(-6.1)                 | 957.5024<br>811.4426[M+H-C <sub>6</sub> H <sub>10</sub> O <sub>4</sub> ] <sup>+</sup> ,<br>599.3877[M+H-C <sub>6</sub> H <sub>10</sub> O <sub>4</sub> -C <sub>6</sub> H <sub>8</sub> O <sub>6</sub> -<br>2H <sub>2</sub> O] <sup>+</sup> ,<br>441.3682[M+H-C <sub>6</sub> H <sub>10</sub> O <sub>4</sub> -2C <sub>6</sub> H <sub>8</sub> O <sub>6</sub> -<br>2H <sub>2</sub> O] <sup>+</sup> ,<br>423.3613[M+H-C <sub>6</sub> H <sub>10</sub> O <sub>4</sub> -2C <sub>6</sub> H <sub>8</sub> O <sub>6</sub> -<br>3H <sub>2</sub> O] <sup>+</sup> ,<br>353.0702[C <sub>12</sub> H <sub>16</sub> O <sub>12</sub> ] | 955.4848                                                                                                                                                                                                                                                                           | Yunganoside A1                           | Triterpenoid<br>saponin | GC     | [6]       |
| 106 | C <sub>30</sub> H <sub>46</sub> O <sub>3</sub>  | 30.14   | 455.3499<br>(-4.6)                 | ND                                 | 455.3491[M+H] <sup>+</sup> ,<br>437.3347[M+H-H <sub>2</sub> O] <sup>+</sup> ,<br>419.3246[M+H-2H <sub>2</sub> O] <sup>+</sup> ,                                                                                                                                                                                                                                                                                                                                                                                                                                                                                  | ND                                                                                                                                                                                                                                                                                 | Isomer of Betulonic<br>acid <sup>c</sup> | Terpenoids              | CH     | [6]       |
| 107 | C <sub>44</sub> H <sub>70</sub> O <sub>14</sub> | 30.33   | 823.4813<br>(-3.1)                 | 821.4613<br>(-4.8)                 | 823.4805[M+H] <sup>+</sup> ,<br>647.3682<br>455.3512[M+H-C <sub>2</sub> H <sub>2</sub> O-Glc-Fuc-<br>H <sub>2</sub> O] <sup>+</sup> ,<br>437.3386[M+H-C <sub>2</sub> H <sub>2</sub> O-Glc-Fuc-<br>2H <sub>2</sub> O] <sup>+</sup> ,                                                                                                                                                                                                                                                                                                                                                                              | 867.4665[M+COOH] <sup>-</sup> ,<br>821.4613[M-H] <sup>-</sup> ,<br>779.4516[M-H-C <sub>2</sub> H <sub>2</sub> O] <sup>-</sup> ,<br>761.4461[M-H-C <sub>2</sub> H <sub>2</sub> O-H <sub>2</sub> O] <sup>-</sup> ,<br>617.3947[M-H-C <sub>2</sub> H <sub>2</sub> O-Glc] <sup>-</sup> | 2''-O-Acetyl-<br>Saikosaponin a          | Triterpenoid<br>saponin | CH     | [20]      |
| 108 | C <sub>42</sub> H <sub>64</sub> O <sub>16</sub> | 30.5    | 825.4259<br>(-1)                   | 823.4073<br>(-5.8)                 | 825.4260[M+H] <sup>+</sup> ,<br>455.3499[M+H-2C <sub>6</sub> H <sub>8</sub> O <sub>6</sub> -H <sub>2</sub> O] <sup>+</sup> ,<br>437.3416[M+H-2C <sub>6</sub> H <sub>8</sub> O <sub>6</sub> -2H <sub>2</sub> O] <sup>+</sup>                                                                                                                                                                                                                                                                                                                                                                                      | 823.4065<br>351.0539[M-H-2Glc] <sup>-</sup>                                                                                                                                                                                                                                        | Uralsaponin C                            | Triterpenoid<br>saponin | GC     | [20]      |

| No. | formula                                         | tr, min | [M+H] <sup>+</sup><br>(error, ppm) | [M-H] <sup>-</sup><br>(error, ppm) | Major fragment ions in<br>positive mode (m, z) <sup>b</sup>                                                                                                                                                                                                                        | Major fragment ions in<br>negative mode (m, z) <sup>b</sup>                                                                                                                                                      | identification                           | Structure<br>type       | Source | Reference |
|-----|-------------------------------------------------|---------|------------------------------------|------------------------------------|------------------------------------------------------------------------------------------------------------------------------------------------------------------------------------------------------------------------------------------------------------------------------------|------------------------------------------------------------------------------------------------------------------------------------------------------------------------------------------------------------------|------------------------------------------|-------------------------|--------|-----------|
| 109 | C <sub>30</sub> H <sub>46</sub> O <sub>3</sub>  | 30.58   | 455.3498<br>(4.8)                  | ND                                 | 455.3504[M+H] <sup>+</sup> ,<br>407.3294[M+H-H <sub>2</sub> O-2CH <sub>3</sub> ] <sup>+</sup> ,                                                                                                                                                                                    | ND                                                                                                                                                                                                               | Isomer of betulonic<br>acid <sup>c</sup> | Terpenoids              | CH     | [25]      |
| 110 | C <sub>42</sub> H <sub>68</sub> O <sub>13</sub> | 30.65   | 781.4696<br>(-4.6)                 | 826.4630<br>(-9.6)                 | 763.4532[M+H-H <sub>2</sub> O] <sup>+</sup> ,<br>601.4086[M+H-Glc-H <sub>2</sub> O] <sup>+</sup> ,<br>455.3492[M+H-Glc-H <sub>2</sub> O-Fuc] <sup>+</sup> ,<br>437.3391[M+H-Glc-2H <sub>2</sub> O-Fuc] <sup>+</sup> ,<br>419.3282[M+H-Glc-3H <sub>2</sub> O-Fuc] <sup>+</sup> ,    | 826.4621[M+COOH] <sup>-</sup> ,<br>780.4575<br>618.4015[M-Glc] <sup>-</sup> ,                                                                                                                                    | Saikosaponin b1 <sup>a</sup>             | Triterpenoid<br>saponin | CH     |           |
| 111 | C <sub>44</sub> H <sub>70</sub> O <sub>14</sub> | 30.75   | 823.4762<br>(-5.6)                 | 821.4645<br>(-5.2)                 | 823.4070[M+H] <sup>+</sup> ,<br>805.4739[M+H-H <sub>2</sub> O] <sup>+</sup> ,<br>611.3492<br>455.3484[M+H-C <sub>2</sub> H <sub>2</sub> O-Glc-Fuc-<br>H <sub>2</sub> O] <sup>+</sup> ,<br>453.3362[M+H-C <sub>2</sub> H <sub>2</sub> O-Glc-Fuc-<br>2H <sub>2</sub> O] <sup>+</sup> | 867.4697[M+COOH] <sup>-</sup> ,<br>821.4645[M-H] <sup>-</sup> ,<br>779.4562[M-H-C <sub>2</sub> H <sub>2</sub> O] <sup>-</sup> ,<br>761.4430[M-H-C <sub>2</sub> H <sub>2</sub> O-H <sub>2</sub> O] <sup>-</sup> , | 2''-O-Acetyl-<br>Saikosaponin b2         | Triterpenoid<br>saponin | CH     | [20]      |
| 112 | C <sub>16</sub> H <sub>12</sub> O <sub>5</sub>  | 31.14   | 285.0750<br>(-2.8)                 | 283.0599<br>(-2.4)                 | 285.0745[M+H] <sup>+</sup> ,<br>270.0511[M+H-CH <sub>3</sub> ] <sup>+</sup> ,                                                                                                                                                                                                      | 283.0602[M-H] <sup>-</sup> ,<br>268.0362[M-H-CH <sub>3</sub> ] <sup>-</sup> ,<br>163.0029[M-H-CH <sub>3</sub> -C <sub>7</sub> H <sub>5</sub> O] <sup>-</sup> ,                                                   | Wogonin <sup>a, c</sup>                  | Flavonoids              | HQ     | [20]      |
| 113 | C <sub>36</sub> H <sub>58</sub> O <sub>8</sub>  | 31.31   | ND                                 | 617.3953<br>(-4.3).                | ND                                                                                                                                                                                                                                                                                 | 663.4081[M+COOH] <sup>-</sup> ,<br>617.3593[M-H] <sup>-</sup> ,                                                                                                                                                  | Prosaikogenin F                          | Triterpenoid<br>saponin | CH     | [20]      |

| No. | formula                                         | tr, min | [M+H] <sup>+</sup><br>(error, ppm) | [M-H] <sup>-</sup><br>(error, ppm) | Major fragment ions in<br>positive mode (m, z) <sup>b</sup>                                                                                                                                                                                                                                                                                              | Major fragment ions in<br>negative mode (m, z) <sup>b</sup>                                                                                                                                                                                                                                                          | identification                               | Structure<br>type       | Source | Reference |
|-----|-------------------------------------------------|---------|------------------------------------|------------------------------------|----------------------------------------------------------------------------------------------------------------------------------------------------------------------------------------------------------------------------------------------------------------------------------------------------------------------------------------------------------|----------------------------------------------------------------------------------------------------------------------------------------------------------------------------------------------------------------------------------------------------------------------------------------------------------------------|----------------------------------------------|-------------------------|--------|-----------|
| 114 | C <sub>42</sub> H <sub>62</sub> O <sub>15</sub> | 31.44   | 807.4110<br>(-6.4)                 | 805.3977<br>(-4.4)                 | 807.4176<br>631.3825[M+H-C <sub>6</sub> H <sub>8</sub> O <sub>6</sub> ] <sup>+</sup> ,<br>455.3489[M+H-C <sub>12</sub> H <sub>16</sub> O <sub>12</sub> ] <sup>+</sup> ,<br>437.3404[M+H-C <sub>12</sub> H <sub>17</sub> O <sub>13</sub> ] <sup>+</sup> ,<br>419.3287[M+H-C <sub>12</sub> H <sub>17</sub> O <sub>13</sub> -H <sub>2</sub> O] <sup>+</sup> | 805.3985<br>351.0542[M-H-C <sub>30</sub> H <sub>45</sub> O <sub>3</sub> ] <sup>-</sup>                                                                                                                                                                                                                               | Licorice saponin C <sub>2</sub>              | Triterpenoid<br>saponin | GC     | [25]      |
| 115 | C <sub>17</sub> H <sub>14</sub> O <sub>6</sub>  | 31.47   | 315.0855<br>(-2.5)                 | ND                                 | 315.0843[M+H] <sup>+</sup> ,<br>300.0611[M+H-CH <sub>3</sub> ] <sup>+</sup> ,<br>285.0385[M+H-2CH <sub>3</sub> ] <sup>+</sup> ,<br>282.0518[M+H-CH <sub>3</sub> -H <sub>2</sub> O] <sup>+</sup> ,<br>182.9911[M+H-C <sub>9</sub> H <sub>8</sub> O] <sup>+</sup> ,<br>154.9966[M+H-C <sub>10</sub> H <sub>8</sub> O <sub>2</sub> ] <sup>+</sup>           | ND                                                                                                                                                                                                                                                                                                                   | 5,7-Dihydroxy-6,8-<br>dimethoxyfavone        | Flavonoids              | HQ     | [6]       |
| 116 | C <sub>15</sub> H <sub>10</sub> O <sub>4</sub>  | 31.59   | 255.0649<br>(-1.3)                 | 253.0497<br>(-3.7)                 | 255.0645[M+H] <sup>+</sup> ,<br>153.0159                                                                                                                                                                                                                                                                                                                 | 253.0494[M-H] <sup>-</sup> ,<br>209.0600[M-H-CO <sub>2</sub> ] <sup>-</sup> ,<br>143.0500                                                                                                                                                                                                                            | Chrysin <sup>a</sup>                         | Flavonoids              | HQ, GC | [5,24]    |
| 117 | C <sub>19</sub> H <sub>18</sub> O <sub>8</sub>  | 31.71   | 375.1060<br>(-3.9)                 | 373.0903<br>(-6.9)                 | 375.0809[M+H] <sup>+</sup> ,<br>345.0586[M+H-2CH <sub>3</sub> ] <sup>+</sup> ,<br>327.0477[M+H-2CH <sub>3</sub> -H <sub>2</sub> O] <sup>+</sup> ,<br>197.0074[M+H-C <sub>10</sub> H <sub>10</sub> O <sub>3</sub> ] <sup>+</sup>                                                                                                                          | 373.0906[M-H] <sup>-</sup> ,<br>358.0668[M-H-CH <sub>3</sub> ] <sup>-</sup> ,<br>343.0435[M-H-2CH <sub>3</sub> ] <sup>-</sup> ,<br>328.0199[M-H-3CH <sub>3</sub> ] <sup>-</sup> ,<br>300.0228[M-H-3CH <sub>3</sub> -CO] <sup>-</sup> ,<br>151.9756[M-H-C <sub>11</sub> H <sub>11</sub> O <sub>5</sub> ] <sup>-</sup> | Skullcapflavone II<br>(Neobaicalein)         | Flavonoids              | HQ     | [5]       |
| 118 | C <sub>16</sub> H <sub>12</sub> O <sub>5</sub>  | 32.24   | 285.0750<br>(-2.7)                 | 283.0601<br>(-3.9)                 | 285.0752[M+H] <sup>+</sup> ,<br>270.0517[M+H-CH <sub>3</sub> ] <sup>+</sup> ,<br>168.0048                                                                                                                                                                                                                                                                | 283.0588[M-H] <sup>-</sup> ,<br>268.0365[M-H-CH <sub>3</sub> ] <sup>-</sup>                                                                                                                                                                                                                                          | Oroxylin A                                   | Flavonoids              | HQ     | [5]       |
| 119 | C <sub>44</sub> H <sub>70</sub> O <sub>14</sub> | 32.35   | 823.4798<br>(-4)                   | 821.3890<br>(-4.9)                 | 823.4716[M+H] <sup>+</sup> ,<br>805.4647[M+H-H <sub>2</sub> O] <sup>+</sup> ,<br>455.3489[M+H-C <sub>2</sub> H <sub>2</sub> O-Glc-Fuc-<br>H <sub>2</sub> O] <sup>+</sup> ,<br>437.3394[M+H-C <sub>2</sub> H <sub>2</sub> O-Glc-Fuc-<br>2H <sub>2</sub> O] <sup>+</sup> ,                                                                                 | 821.4589[M-H] <sup>-</sup> ,<br>779.4503[M-H-C <sub>2</sub> H <sub>2</sub> O] <sup>-</sup> ,<br>761.4277[M-H-C <sub>2</sub> H <sub>2</sub> O-H <sub>2</sub> O] <sup>-</sup> ,<br>617.4114[M-H-C <sub>2</sub> H <sub>2</sub> O-Glc] <sup>-</sup>                                                                      | 3''-O-Acetyl-<br>Saikosaponin b <sub>2</sub> | Triterpenoid<br>saponin | CH     | [15,30]   |

| No. | formula                                         | tr, min | [M+H] <sup>+</sup><br>(error, ppm) | [M-H] <sup>-</sup><br>(error, ppm) | Major fragment ions in<br>positive mode (m, z) <sup>b</sup>                                                                                                                                                                                        | Major fragment ions in<br>negative mode (m, z) <sup>b</sup>                                                                                                                                                                           | identification   | Structure<br>type       | Source | Reference |
|-----|-------------------------------------------------|---------|------------------------------------|------------------------------------|----------------------------------------------------------------------------------------------------------------------------------------------------------------------------------------------------------------------------------------------------|---------------------------------------------------------------------------------------------------------------------------------------------------------------------------------------------------------------------------------------|------------------|-------------------------|--------|-----------|
|     |                                                 |         |                                    |                                    | 419.3278[M+H-C <sub>2</sub> H <sub>2</sub> O-Glc-Fuc-3H <sub>2</sub> O] <sup>+</sup>                                                                                                                                                               |                                                                                                                                                                                                                                       |                  |                         |        |           |
| 120 | C <sub>42</sub> H <sub>68</sub> O <sub>12</sub> | 32.45   | ND                                 | 763.4553<br>(-4.6)                 | ND                                                                                                                                                                                                                                                 | 809.4574[M-H+HCOOH] <sup>-</sup> ,<br>763.4553[M-H] <sup>-</sup> ,<br>601.4477[M-H-C <sub>6</sub> H <sub>10</sub> O <sub>5</sub> ] <sup>-</sup>                                                                                       | Saikosaponin m   | Triterpenoid<br>saponin | CH     | [20]      |
| 121 | C <sub>20</sub> H <sub>18</sub> O <sub>6</sub>  | 32.71   | 355.1162<br>(-3.9)                 | 353.1008<br>(-6.4)                 | 355.1161<br>299.0565[M+H-C <sub>4</sub> H <sub>7</sub> ] <sup>+</sup>                                                                                                                                                                              | 353.1004<br>285.1101[M-H-C <sub>5</sub> H <sub>9</sub> ] <sup>-</sup> ,<br>163.0011[M-H-C <sub>5</sub> H <sub>9</sub> -C <sub>6</sub> H <sub>4</sub> O <sub>3</sub> ] <sup>-</sup>                                                    | Licoisoflavone A | Flavonoids              | GC     | [25]      |
| 122 | C <sub>21</sub> H <sub>20</sub> O <sub>6</sub>  | 32.84   | 369.1330<br>(-0.6)                 | 367.1166<br>(-5.8)                 | 369.1313<br>313.0691[M+H-C <sub>4</sub> H <sub>7</sub> ] <sup>+</sup> ,<br>285.0744[M+H-C <sub>5</sub> H <sub>9</sub> -CH <sub>3</sub> ] <sup>+</sup> ,<br>271.0583[M+H-C <sub>5</sub> H <sub>9</sub> -CH <sub>3</sub> O] <sup>+</sup><br>243.0587 | 367.1175<br>309.0390[M-H-C <sub>3</sub> H <sub>6</sub> -CH <sub>3</sub> ] <sup>-</sup> ,<br>297.0398[M-H-C <sub>5</sub> H <sub>9</sub> ] <sup>-</sup> ,<br>284.0287[M-H-C <sub>5</sub> H <sub>9</sub> -CH <sub>3</sub> ] <sup>-</sup> | Glycycoumarin    | Phenylpropa<br>noids    | GC     | [6]       |
| 123 | C <sub>36</sub> H <sub>58</sub> O <sub>8</sub>  | 32.85   | ND                                 | 617.4028<br>(-6.9)                 | ND                                                                                                                                                                                                                                                 | 663.4065[M+COOH] <sup>-</sup> ,<br>617.4246[M-H] <sup>-</sup>                                                                                                                                                                         | Prosaikogenin D  | Triterpenoid<br>saponin | CH     | [6]       |
| 124 | C <sub>42</sub> H <sub>68</sub> O <sub>12</sub> | 33.08   | ND                                 | 763.4554<br>(-3.8)                 | ND                                                                                                                                                                                                                                                 | 809.4136[M+COOH] <sup>-</sup> ,<br>763.4554[M-H] <sup>-</sup> ,<br>601.4007[M-H-C <sub>6</sub> H <sub>10</sub> O <sub>5</sub> ] <sup>-</sup>                                                                                          | Saikosaponin e   | Triterpenoid<br>saponin | CH     | [25]      |
| 125 | C <sub>36</sub> H <sub>58</sub> O <sub>8</sub>  | 33.34   | ND                                 | 617.3950<br>(-3.8)                 | ND                                                                                                                                                                                                                                                 | 663.4025[M+COOH] <sup>-</sup> ,<br>617.4454[M-H] <sup>-</sup>                                                                                                                                                                         | Prosaikogenin G  | Triterpenoid<br>saponin | CH     | [25]      |

| No. | formula                                         | tr, min | [M+H] <sup>+</sup><br>(error, ppm) | [M-H] <sup>-</sup><br>(error, ppm) | Major fragment ions in<br>positive mode (m, z) <sup>b</sup>                                                                                                                                                                                                                                                                                                                        | Major fragment ions in<br>negative mode (m, z) <sup>b</sup>                                                                                                                                                                                                                            | identification                  | Structure<br>type       | Source | Reference |
|-----|-------------------------------------------------|---------|------------------------------------|------------------------------------|------------------------------------------------------------------------------------------------------------------------------------------------------------------------------------------------------------------------------------------------------------------------------------------------------------------------------------------------------------------------------------|----------------------------------------------------------------------------------------------------------------------------------------------------------------------------------------------------------------------------------------------------------------------------------------|---------------------------------|-------------------------|--------|-----------|
| 126 | C <sub>20</sub> H <sub>16</sub> O <sub>6</sub>  | 33.48   | 353.1018<br>(-0.4)                 | 351.0849<br>(-5.5)                 | 353.1016<br>153.0175[M+H-C <sub>13</sub> H <sub>12</sub> O <sub>2</sub> ] <sup>+</sup>                                                                                                                                                                                                                                                                                             | 351.0847<br>321.0396[M-H-2CH <sub>3</sub> ] <sup>-</sup> ,<br>203.0367[M-H-C <sub>7</sub> H <sub>4</sub> O <sub>4</sub> ] <sup>-</sup>                                                                                                                                                 | Licoisoflavone B                | Flavonoids              | GC     | [25]      |
| 127 | C <sub>44</sub> H <sub>70</sub> O <sub>14</sub> | 33.66   | 823.4827<br>(-1.4)                 | 821.4650<br>(-4.4)                 | 823.4812[M+H] <sup>+</sup> ,<br>805.4756[M+H-H <sub>2</sub> O] <sup>+</sup> ,<br>641.4089<br>455.3510[M+H-C <sub>2</sub> H <sub>2</sub> O-Glc-Fuc-<br>H <sub>2</sub> O] <sup>+</sup> ,<br>437.3392[M+H-C <sub>2</sub> H <sub>2</sub> O-Glc-Fuc-<br>2H <sub>2</sub> O] <sup>+</sup> ,<br>419.3276[M+H-C <sub>2</sub> H <sub>2</sub> O-Glc-Fuc-<br>3H <sub>2</sub> O] <sup>+</sup> , | 867.4648[M+COOH] <sup>-</sup> ,<br>821.1650[M-H] <sup>-</sup> ,                                                                                                                                                                                                                        | 4''-O-Acetyl-<br>Saikosaponin A | Triterpenoid<br>saponin | CH     | [6]       |
| 128 | C <sub>44</sub> H <sub>70</sub> O <sub>14</sub> | 34.04   | 823.4815<br>(-2.9)                 | 821.4648<br>(-4.6)                 | 823.4805[M+H] <sup>+</sup> ,<br>805.4653[M+H-H <sub>2</sub> O] <sup>+</sup> ,<br>787.4477<br>455.3505[M+H-C <sub>2</sub> H <sub>2</sub> O-Glc-Fuc-<br>H <sub>2</sub> O] <sup>+</sup> ,<br>437.3398[M+H-C <sub>2</sub> H <sub>2</sub> O-Glc-Fuc-<br>2H <sub>2</sub> O] <sup>+</sup> ,                                                                                               | 867.4702[M+COOH] <sup>-</sup> ,<br>821.4648[M-H] <sup>-</sup> ,                                                                                                                                                                                                                        | 4''-O-Acetyl<br>Saikosaponin B2 | Triterpenoid<br>saponin | CH     | [20]      |
| 129 | C <sub>46</sub> H <sub>72</sub> O <sub>15</sub> | 34.61   | 865.4934<br>(-1.2)                 | 863.4714<br>(-5.2)                 | ND                                                                                                                                                                                                                                                                                                                                                                                 | 909.4688[M+COOH] <sup>-</sup> ,<br>863.4714[M-H] <sup>-</sup> ,<br>821.4593[M-H-C <sub>2</sub> H <sub>2</sub> O] <sup>-</sup> ,<br>761.4691[M-H-2C <sub>2</sub> H <sub>2</sub> O-H <sub>2</sub> O] <sup>-</sup> ,<br>617.3882[M-H-2C <sub>2</sub> H <sub>2</sub> O-Glc] <sup>-</sup> , | Diacetyl Saikosaponin<br>A      | Triterpenoid<br>saponin | CH     | [20]      |
| 130 | C <sub>20</sub> H <sub>18</sub> O <sub>6</sub>  | 34.89   | 355.1174<br>(-0.6)                 | 353.1008<br>(-5.8)                 | 355.1134<br>299.0543[M+H-C <sub>4</sub> H <sub>7</sub> ] <sup>+</sup>                                                                                                                                                                                                                                                                                                              | 353.1011<br>285.1110[M-H-C <sub>5</sub> H <sub>9</sub> ] <sup>-</sup> ,<br>125.0236[M-H-C <sub>5</sub> H <sub>9</sub> -C <sub>9</sub> H <sub>6</sub> O <sub>3</sub> ] <sup>-</sup>                                                                                                     | Gancaonin L                     | Flavonoids              | GC     | [20]      |
| 131 | C <sub>20</sub> H <sub>20</sub> O <sub>4</sub>  | 36.08   | ND                                 | 323.1273<br>(-4.6)                 | ND                                                                                                                                                                                                                                                                                                                                                                                 | 323.1259[M-H] <sup>-</sup> ,<br>201.0920[M-H-H <sub>2</sub> O] <sup>-</sup> ,<br>135.0451[M-H-C <sub>12</sub> H <sub>12</sub> O <sub>2</sub> ] <sup>-</sup> ,                                                                                                                          | Glabridin <sup>c</sup>          | Flavonoids              | GC     | [6]       |

| No. | formula                                        | tr, min | [M+H] <sup>+</sup><br>(error, ppm) | [M-H] <sup>-</sup><br>(error, ppm) | Major fragment ions in<br>positive mode (m, z) <sup>b</sup>                                                                                                                         | Major fragment ions in<br>negative mode (m, z) <sup>b</sup>                                                                                            | identification                                   | Structure<br>type       | Source | Reference |
|-----|------------------------------------------------|---------|------------------------------------|------------------------------------|-------------------------------------------------------------------------------------------------------------------------------------------------------------------------------------|--------------------------------------------------------------------------------------------------------------------------------------------------------|--------------------------------------------------|-------------------------|--------|-----------|
| 132 | C <sub>21</sub> H <sub>22</sub> O <sub>5</sub> | 37.92   | 355.1517<br>(-6.6)                 | 353.1380<br>(-4)                   | 355.1069<br>189.0923[M+H-CH <sub>3</sub> -C <sub>8</sub> H <sub>6</sub> O <sub>3</sub> ] <sup>+</sup><br>153.0529[M+H-C <sub>13</sub> H <sub>14</sub> O <sub>2</sub> ] <sup>+</sup> | 353.1358<br>338.1126[M-H-CH <sub>3</sub> ] <sup>-</sup><br>150.0316[M-H-CH <sub>3</sub> -C <sub>12</sub> H <sub>13</sub> O <sub>2</sub> ] <sup>-</sup> | Licochalcone D                                   | Flavonoids              | GC     | [20]      |
| 133 | C <sub>30</sub> H <sub>46</sub> O <sub>4</sub> | 39.82   | 471.3454<br>(-3.1)                 | 469.3278<br>(-8.5)                 | 471.3442[M+H] <sup>+</sup> ,                                                                                                                                                        | 469.3279[M-H] <sup>-</sup> ,<br>425.3379[M-H-CO <sub>2</sub> ] <sup>-</sup> ,                                                                          | Glycyrrhetic acid<br>(enoxolone) <sup>a, c</sup> | Triterpenoid<br>saponin | GC     | [6]       |

Footnote: “a” Compared with reference standards; “b” The losses are: Glc= glucose moiety, Fuc= fructose; ND=not detect; “c” Confirmation in comparison with mass spectral library (Natural Products HR-MS, MS Spectral Library, Version 1.0; AB Sciex, Foster City, USA).

CH: Bupleuri Radix, HQ: Scutellariae radix, SJ: Zingiberis rhizoma recens, JBX: Pinelliae rhizoma praeparatum cum zingibere et alumine, DZ: Jujubae fructus, DS: Codonopsis radix, GC: Glycyrrhizae Radix.

**Table S3** Results of calibration curve and content for the determination of 9 compounds

| <b>Name</b>       | <b>Regression equation</b> | <b>R<sup>2</sup></b> | <b>Linear range</b><br><b>(μg/ml)</b> | <b>Contents</b><br><b>(mg/g)</b> |
|-------------------|----------------------------|----------------------|---------------------------------------|----------------------------------|
| baicalin          | $y = 6.7581x + 0.4186$     | 0.9961               | 0.53~4.74                             | 3.25                             |
| baicalein         | $y = 4.8933x + 9.445$      | 0.9999               | 1.24~11.20                            | 0.34                             |
| Wogonin           | $y = 6.8079x + 0.4146$     | 0.9983               | 6.32~61.97                            | 0.2                              |
| Wogonoside        | $y = 5.5312x + 3.6203$     | 0.9990               | 9.77~87.89                            | 2.8                              |
| quercetin         | $y = 6.3909x + 0.4414$     | 0.9991               | 0.08~0.72                             | 0.01                             |
| Saikosaponin B1   | $y = 3.8802x + 0.4141$     | 0.9994               | 0.86~7.73                             | 0.2                              |
| Saikosaponin B2   | $y = 3.854x + 0.4052$      | 0.9998               | 0.89~7.97                             | 0.25                             |
| glycyrrhizic acid | $y = 5.0736x + 8.023$      | 0.9974               | 1.15~10.34                            | 2.05                             |
| Liquiritin        | $y = 4.8287x + 0.9097$     | 0.9955               | 1.10~9.82                             | 0.54                             |



**Table S4** The active ingredients of XCHG

| <b>Name</b> | <b>chemical compound</b>          |
|-------------|-----------------------------------|
| X1          | Glycyrrhetic Acid                 |
| X2          | 5,7,8-Trihydroxy-6-methoxyflavone |
| X3          | Aspartic acid                     |
| X4          | Baicalein                         |
| X5          | Betulonic acid                    |
| X6          | Curcumin                          |
| X7          | Desaminotyrosine                  |
| X8          | Formononetin                      |
| X9          | Glabridin                         |
| X10         | Glycyrrhizic acid                 |
| X11         | Isoliquiritigenin                 |
| X12         | Licoisoflavone A                  |
| X13         | Licoisoflavone B                  |
| X14         | Licoricesaponin G2                |
| X15         | liquiritigenin                    |
| X16         | Liquiritin                        |
| X17         | Proline                           |
| X18         | Quercetin                         |
| X19         | Saikosaponin A                    |
| X20         | Saikosaponin B1                   |
| X21         | Saikosaponin B2                   |
| X22         | Saikosaponin C                    |
| X23         | Valine                            |
| X24         | Wogonin                           |
| X25         | Wogonoside                        |
| X26         | Dihydrobaicalein                  |
| X27         | Baicalin                          |
| X28         | Neobaicalein                      |
| X29         | Adenosine                         |
| X30         | Lobetyolin                        |

**Table S5** Enriched KEGG signaling pathway/GO biological process of XCHG-fever targets

| <b>Biological functional modules</b> | <b>Type</b> | <b>GO biological process/ KEGG signaling pathway</b>     | <b><i>p</i>-value</b> |
|--------------------------------------|-------------|----------------------------------------------------------|-----------------------|
| Inflammation/Immune                  | KEGG        | NF-kappa B signaling pathway                             | 9.72E-10              |
|                                      | KEGG        | TNF signaling pathway                                    | 2.55E-15              |
|                                      | GO          | inflammatory response                                    | 1.38E-16              |
| Neuromodulation                      | KEGG        | Neuroactive ligand-receptor interaction                  | 1.94E-04              |
|                                      | KEGG        | Serotonergic synapse                                     | 1.98E-07              |
|                                      | KEGG        | Inflammatory mediator regulation of TRP channels         | 8.70E-05              |
|                                      | GO          | calcium-mediated signaling                               | 1.17E-05              |
| Vasodilatory                         | KEGG        | Relaxin signaling pathway                                | 1.79E-10              |
|                                      | GO          | positive regulation of nitric oxide biosynthetic process | 1.73E-13              |
|                                      | GO          | response to muscle stretch                               | 3.97E-07              |
| Metabolism                           | KEGG        | Endocrine resistance                                     | 2.13E-20              |
|                                      | KEGG        | cAMP signaling pathway                                   | 2.22E-08              |
|                                      | GO          | glucose metabolic process                                | 6.51E-06              |
|                                      | GO          | positive regulation of cholesterol efflux                | 4.98E-05              |
|                                      | GO          | positive regulation of prostaglandin secretion           | 7.06E-04              |

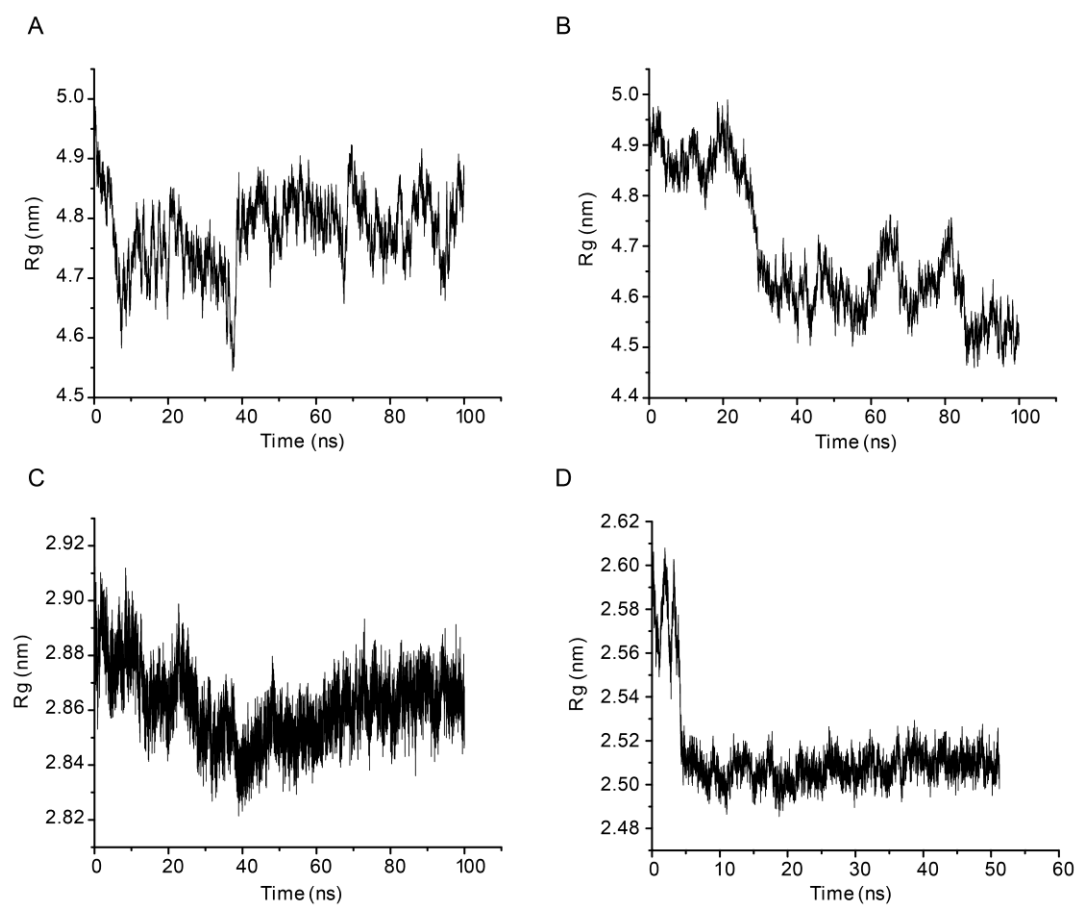

**Figure S1.** Radius of gyration (Rg) values of indicated complexes: GABBR2-saikosaponin C (A), GABBR2-baicalin (B), NFKBIA-glycyrrhizic acid (C) and PTGS2-lobetyolin (D) from the data of 100 ns MDs trajectories.

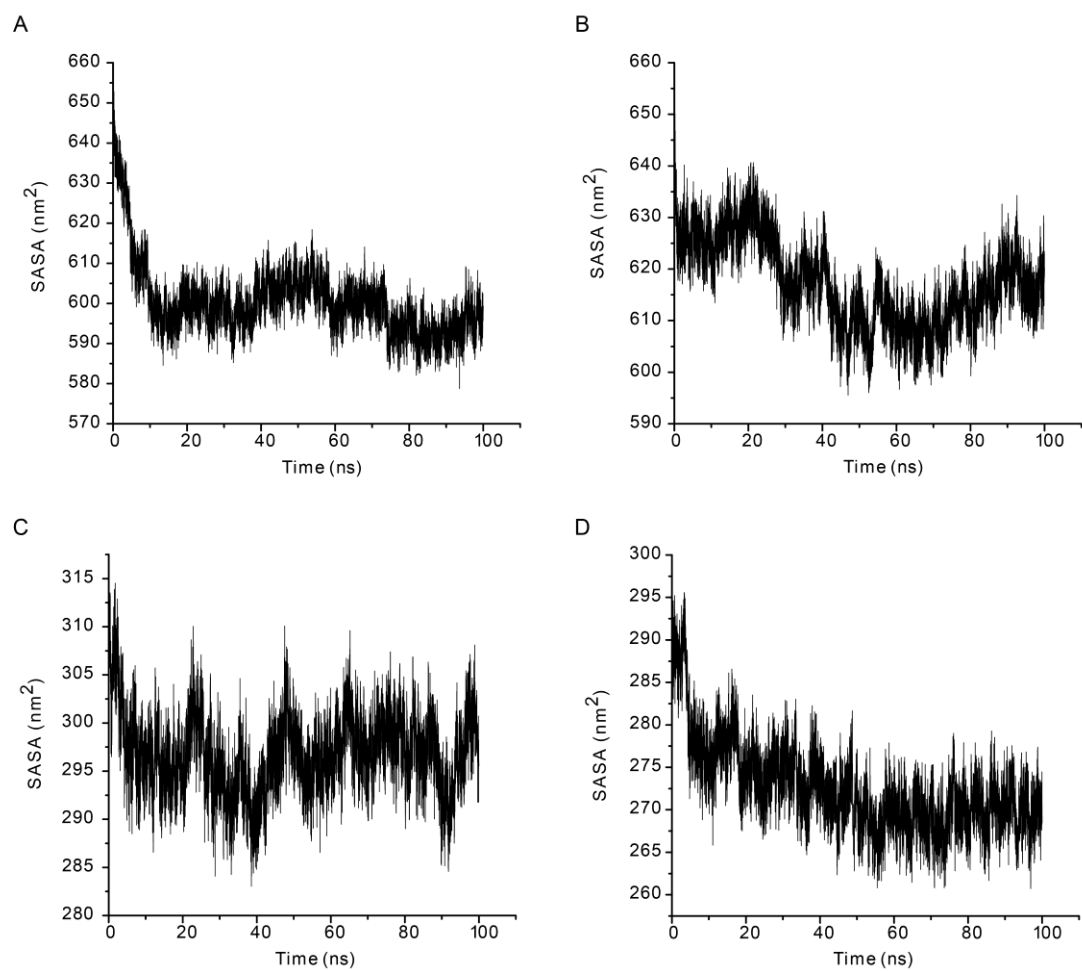

**Figure S2.** Solvent accessible surface area (SASA) values of indicated complexes: GABBR2-saikosaponin C (**A**), GABBR2-baicalin (**B**), NFKBIA-glycyrrhizic acid (**C**) and PTGS2-lobetyolin (**D**) from the data of 100 ns MDs trajectories.

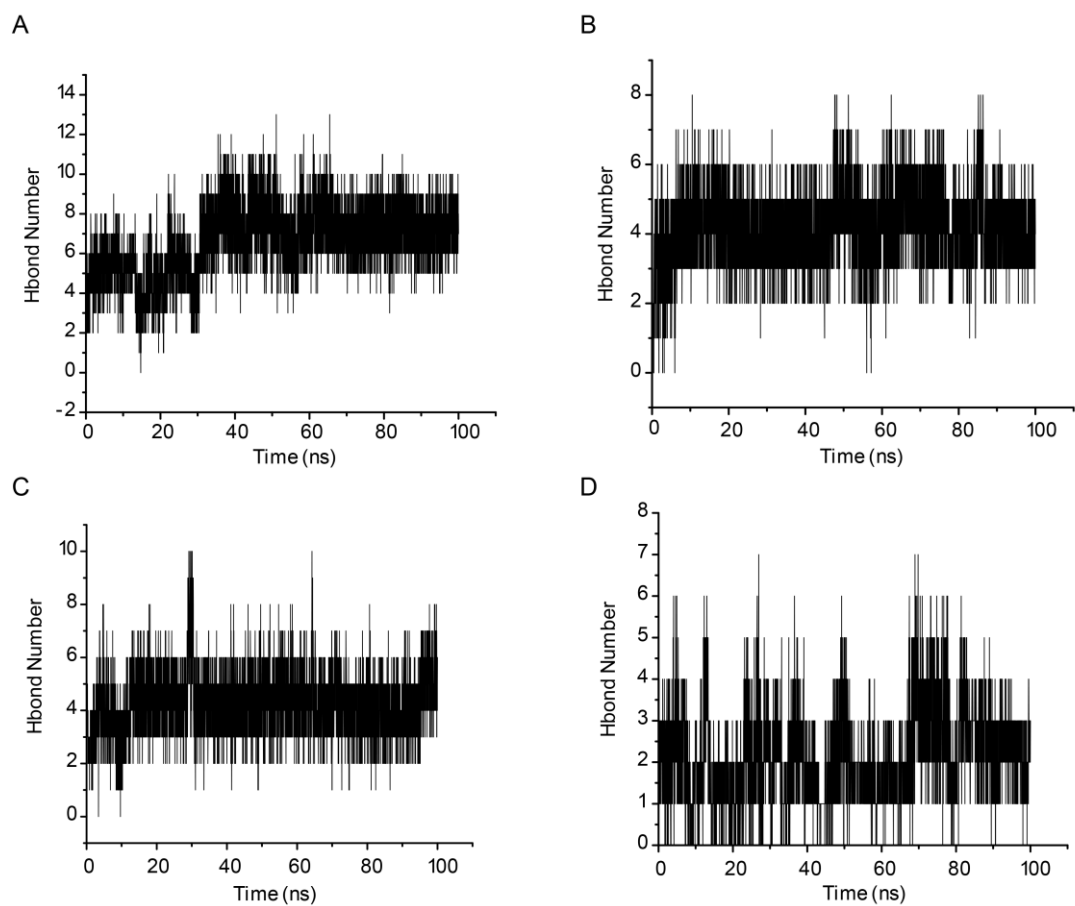

**Figure S3.** Hydrogen bond (Hbond) numbers of indicated complexes: GABBR2-saikosaponin C (**A**), GABBR2-baicalin (**B**), NFKBIA-glycyrrhizicacid (**C**) and PTGS2-lobetyolin (**D**) from the data of 100 ns MDs trajectories.

## Reference

1. Wu, Y.; Peng, Y.; Song, C.; Li, L.; Ma, H.; Li, D.; Wang, F.; Yang, J.; Song, S.; Wu, C. Separation and identification of multiple constituents in Xiao Chai Hu Decoction (Sho-saiko-to) by bioactivity-guided fractionation combined with LC-ESI-QTOFMS/MS. *Biomed Chromatogr* **2015**, *29*, 1146-1166. <https://doi.org/10.1002/bmc.3402>.
2. Guo, S.; Duan, J.A.; Qian, D.; Tang, Y.; Qian, Y.; Wu, D.; Su, S.; Shang, E. Rapid determination of amino acids in fruits of *Ziziphus jujuba* by hydrophilic interaction ultra-high-performance liquid chromatography coupled with triple-quadrupole mass spectrometry. *J Agric Food Chem* **2013**, *61*, 2709-2719. <https://doi.org/10.1021/jf305497r>.
3. Gao, S.; Liu, J.; Wang, M.; Liu, Y.; Meng, X.; Zhang, T.; Qi, Y.; Zhang, B.; Liu, H.; Sun, X.; et al. Exploring on the bioactive markers of *Codonopsis Radix* by correlation analysis between chemical constituents and pharmacological effects. *Journal of Ethnopharmacology* **2019**, *236*, 31-41. <https://doi.org/10.1016/j.jep.2019.02.032>.
4. Ma, X.Q.; Leung, A.K.; Chan, C.L.; Su, T.; Li, W.D.; Li, S.M.; Fong, D.W.; Yu, Z.L. UHPLC UHD Q-TOF MS/MS analysis of the impact of sulfur fumigation on the chemical profile of *Codonopsis Radix* (Dangshen). *Analyst* **2014**, *139*, 505-516. <https://doi.org/10.1039/c3an01561k>.
5. Chen, T.; Wang, X.; Chen, P.; Zheng, Y.; He, Y.; Zeng, X.; Peng, W.; Su, W. Chemical components analysis and in vivo metabolite profiling of Jian'er Xiaoshi oral liquid by UHPLC-Q-TOF-MS/MS. *Journal of Pharmaceutical and Biomedical Analysis* **2022**, *211*, 114629. <https://doi.org/10.1016/j.jpba.2022.114629>.
6. Tan, G.; Zhu, Z.; Zhang, H.; Zhao, L.; Liu, Y.; Dong, X.; Lou, Z.; Zhang, G.; Chai, Y. Analysis of phenolic and triterpenoid compounds in licorice and rat plasma by high-performance liquid chromatography diode-array detection, time-of-flight mass spectrometry and quadrupole ion trap mass spectrometry. *Rapid Commun. Mass Spectrom.* **2010**, *24*, 209-218. <https://doi.org/10.1002/rcm.4373>.
7. Han, J.; Ye, M.; Xu, M.; Sun, J.; Wang, B.; Guo, D. Characterization of flavonoids in the traditional Chinese herbal medicine-Huangqin by liquid chromatography coupled with electrospray ionization mass spectrometry. *Journal of Chromatography B* **2007**, *848*, 355-362. <https://doi.org/10.1016/j.jchromb.2006.10.061>.
8. Farag, M.A.; Porzel, A.; Wessjohann, L.A. Comparative metabolite profiling and fingerprinting of medicinal licorice roots using a multiplex approach of GC-MS, LC-MS and 1D NMR techniques. *Phytochemistry* **2012**, *76*, 60-72. <https://doi.org/10.1016/j.phytochem.2011.12.010>.
9. Liao, W.C.; Lin, Y.-H.; Chang, T.-M.; Huang, W.-Y. Identification of two licorice species, *Glycyrrhiza uralensis* and *Glycyrrhiza glabra*, based on separation and identification of their bioactive components. *Food Chemistry* **2012**, *132*, 2188-2193. <https://doi.org/10.1016/j.foodchem.2011.12.051>.
10. Zhang, Q.; Ye, M. Chemical analysis of the Chinese herbal medicine Gan-Cao (licorice). *J Chromatogr A* **2009**, *1216*, 1954-1969. <https://doi.org/10.1016/j.chroma.2008.07.072>.
11. Yin, Q.; Wang, P.; Zhang, A.; Sun, H.; Wu, X.; Wang, X. Ultra-performance LC-ESI/quadrupole-TOF MS for rapid analysis of chemical constituents of Shaoyao-Gancao decoction. *Journal of Separation Science* **2013**, *36*, 1238-1246. <https://doi.org/10.1002/jssc.201201198>.
12. Shang, Z.; Liu, C.; Qiao, X.; Ye, M. Chemical analysis of the Chinese herbal medicine licorice (Gan-Cao): An update review. *J Ethnopharmacol* **2022**, *299*, 115686. <https://doi.org/10.1016/j.jep.2022.115686>.
13. Du, T.; Zeng, M.; Chen, L.; Cao, Z.; Cai, H.; Yang, G. Chemical and Absorption Signatures of Xiao Chai Hu Tang. *Rapid Commun Mass Spectrom* **2018**. <https://doi.org/10.1002/rcm.8114>.
14. Seo, O.N.; Kim, G.-S.; Kim, Y.-H.; Park, S.; Jeong, S.W.; Lee, S.J.; Jin, J.S.; Shin, S.C. Determination of polyphenol components of Korean *Scutellaria baicalensis* Georgi using liquid chromatography-tandem mass spectrometry: Contribution to overall antioxidant activity. *Journal of Functional Foods* **2013**, *5*, 1741-1750. <https://doi.org/10.1016/j.jff.2013.07.020>.

15. Zhang, F.; Li, Z.; Li, M.; Yuan, Y.; Cui, S.; Chen, J.; Li, R. An integrated strategy for profiling the chemical components of *Scutellariae Radix* and their exogenous substances in rats by ultra-high-performance liquid chromatography/quadrupole time-of-flight mass spectrometry. *Rapid Communications in Mass Spectrometry* **2020**, *34*, e8823. <https://doi.org/10.1002/rcm.8823>.
16. Qiao, X.; Li, R.; Song, W.; Miao, W.-j.; Liu, J.; Chen, H.-b.; Guo, D.-a.; Ye, M. A targeted strategy to analyze untargeted mass spectral data: Rapid chemical profiling of *Scutellaria baicalensis* using ultra-high performance liquid chromatography coupled with hybrid quadrupole orbitrap mass spectrometry and key ion filtering. *Journal of Chromatography A* **2016**, *1441*, 83-95. <https://doi.org/10.1016/j.chroma.2016.02.079>.
17. Montero, L.; Ibáñez, E.; Russo, M.; di Sanzo, R.; Rastrelli, L.; Piccinelli, A.L.; Celano, R.; Cifuentes, A.; Herrero, M. Metabolite profiling of licorice (*Glycyrrhiza glabra*) from different locations using comprehensive two-dimensional liquid chromatography coupled to diode array and tandem mass spectrometry detection. *Anal Chim Acta* **2016**, *913*, 145-159. <https://doi.org/10.1016/j.aca.2016.01.040>.
18. Zhou, Y.; Wang, M.-K.; Liao, X.; Zhu, X.-M.; Peng, S.-L.; Ding, L.-S. Rapid identification of compounds in *Glycyrrhiza uralensis* by liquid chromatography/tandem mass spectrometry. *Chinese journal of analytical chemistry* **2004**, *32*, 174-178. <https://api.semanticscholar.org/CorpusID:100157464>.
19. Morimoto, S.; Harioka, T.; Shoyama, Y. Purification and characterization of flavone-specific  $\beta$ -glucuronidase from callus cultures of *Scutellaria baicalensis* Georgi. *Planta* **1995**, *195*, 535-540. <https://doi.org/10.1007/BF00195712>.
20. Lei, T.; Chen, S.; Wang, K.; Zhang, D.; Dong, L.; Lv, C.; Wang, J.; Lu, J. Characterization and discrimination of raw and vinegar-baked *Bupleuri radix* based on UHPLC-Q-TOF-MS coupled with multivariate statistical analysis. *Biomedical Chromatography* **2018**, *32*, e4044. <https://doi.org/10.1002/bmc.4044>.
21. Xuan, C.; Zhao, X.; Feng, F.; Qiao, B. The study of chemical components of *Glycyrrhiza* in Shanxi. *Natural Product Research and Development* **2000**, *12*, 18-22. <https://europepmc.org/article/CBA/333984>.
22. Miyaichi, Y.; Imoto, Y.; Tomimori, T.; Namba, T. Studies on the Nepalese crude drugs. IX. On the flavonoid constituents of the root of *Scutellaria scandens* Buch.-Ham. ex D. Don. *Chem. Pharm. Bull.* **1988**, *36*, 2371. <https://doi.org/10.1248/cpb.36.2371>.
23. Liu, G.; Rajesh, N.; Wang, X.; Zhang, M.; Wu, Q.; Li, S.; Chen, B.; Yao, S. Identification of flavonoids in the stems and leaves of *Scutellaria baicalensis* Georgi. *Journal of Chromatography B* **2011**, *879*, 1023-1028. <https://doi.org/10.1016/j.jchromb.2011.02.050>.
24. Liu, G.; Ma, J.; Chen, Y.; Tian, Q.; Shen, Y.; Wang, X.; chen, B.; Yao, S. Investigation of flavonoid profile of *Scutellaria bacalensis* Georgi by high performance liquid chromatography with diode array detection and electrospray ion trap mass spectrometry. *Journal of Chromatography A* **2009**, *1216*, 4809-4814. <https://doi.org/10.1016/j.chroma.2009.04.021>.
25. Shan, L.; Yang, N.; Zhao, Y.; Sheng, X.; Yang, S.; Li, Y. A rapid classification and identification method applied to the analysis of glycosides in *Bupleuri radix* and liquorice by ultra high performance liquid chromatography coupled with quadrupole time-of-flight mass spectrometry. *Journal of Separation Science* **2018**, *41*, 3791-3805. <https://doi.org/10.1002/jssc.201800619>.
26. Bai, M.; Zheng, C.-J.; Wu, L.-J.; Wu, S.-Y.; Cai, Y.; Chen, G.-Y.; Han, C.-R.; Song, X.-P. Bioactive flavonoid derivatives from *Scutellaria luzonica*. *Chemistry of Natural Compounds* **2018**, *54*, 350-353. <https://doi.org/10.1007/s10600-018-2342-y>.
27. Ren, Q.; Xia, T.; Quan, X.-G.; Ding, L.; Wang, H.-Y. Antileukemic activity of the chemical constituents from *scutellaria barbata* d. don. *Acta Chromatogr.* **2017**, *29*, 399-413. <https://doi.org/10.1556/1326.2017.29.3.10>.
28. Lee, S.M.; Min, B.S.; Lee, C.G.; Kim, K.S.; Kho, Y.H. Cytotoxic triterpenoids from the fruits of *Zizyphus jujuba*. *Planta Med* **2003**, *69*, 1051-1054. <https://doi.org/10.1055/s-2003-45155>.
29. Lee, S.M.; Park, J.G.; Lee, Y.H.; Lee, C.G.; Min, B.S.; Kim, J.H.; Lee, H.K. Anti-

- complementary activity of triterpenoides from fruits of *Zizyphus jujuba*. *Biol Pharm Bull* **2004**, 27, 1883-1886. <https://doi.org/10.1248/bpb.27.1883>.
30. Jiang, Y.; Liu, R.; Chen, J.; Liu, M.; Liu, M.; Liu, B.; Yi, L.; Liu, S. Application of multifold characteristic ion filtering combined with statistical analysis for comprehensive profiling of chemical constituents in anti-renal interstitial fibrosis I decoction by ultra-high performance liquid chromatography coupled with hybrid quadrupole-orbitrap high resolution mass spectrometry. *Journal of Chromatography A* **2019**, 1600, 197-208. <https://doi.org/10.1016/j.chroma.2019.04.051>.
